1 KD-64 – a new selective A<sub>2A</sub> adenosine receptor antagonist has anti-inflammatory activity but  
2 contrary to the non-selective antagonist – caffeine does not reduce diet-induced obesity in  
3 mice

4  
5 Magdalena Kotańska<sup>1\*</sup>, Anna Dziubina<sup>2</sup>, Małgorzata Szafarz<sup>3</sup>, Kamil Mika<sup>1</sup>, Karolina  
6 Reguła<sup>1</sup>, Marek Bednarski<sup>1</sup>, Małgorzata Zygmunt<sup>1</sup>, Anna Drabczyńska<sup>4</sup>, Jacek Sapa<sup>1</sup>,  
7 Katarzyna Kieć-Kononowicz<sup>4</sup>

8  
9 <sup>1</sup>Department of Pharmacological Screening, Jagiellonian University Medical College, 9  
10 Medyczna Street, PL 30-688 Krakow, Poland

11 <sup>2</sup>Department of Pharmacodynamics, Jagiellonian University Medical College, 9 Medyczna  
12 Street, PL 30-688 Krakow, Poland

13 <sup>3</sup>Department of Pharmacokinetics and Physical Pharmacy, Jagiellonian University Medical  
14 College, Krakow, Poland

15 <sup>4</sup>Department of Technology and Biotechnology of Drugs, Faculty of Pharmacy, Jagiellonian  
16 University Medical College, Krakow, Poland

17

18 \* **Correspondence:** Magdalena Kotańska, e-mail: [magda.dudek@uj.edu.pl](mailto:magda.dudek@uj.edu.pl)

19 Tel.: +48 12 6205530; fax: +48 12 6205530

20

21 All authors contributed to this work.

22

23 **Running title:** Some properties of KD-64 - selective A<sub>2A</sub> adenosine receptor antagonist

24

25

26 **Abstract**

27 The A<sub>2</sub> adenosine receptors play an important role, among others, in the regulation of  
28 inflammatory process and glucose homeostasis in diabetes and obesity. Thus, the presented  
29 project evaluated of influence of the selective antagonist of A<sub>2A</sub> adenosine receptor – KD-64  
30 as compared to the known non-selective antagonist – caffeine on these two particular  
31 processes. Two different inflammation models were induced namely local and systemic  
32 inflammation. Obesity was induced in mice by high-fat diet and the tested compounds (KD-  
33 64 and caffeine) were administrated for 21 days. KD-64 showed anti-inflammatory effect in  
34 both tested inflammation models and administered at the same dose as ketoprofen exerted  
35 stronger effect than this reference compound. Elevated levels of IL-6 and TNF- $\alpha$  observed in  
36 obese control mice were significantly lowered by the administration of KD-64 and were  
37 similar to the values observed in control non-obese mice. Interestingly, caffeine increased the  
38 levels of these parameters. In contrast to caffeine which had no influence on AlaT activity,  
39 KD-64 administration significantly lowered AlaT activity in the obese mice. Although,  
40 contrary to caffeine, KD-64 did not reduce diet-induced obesity in mice, it improved glucose  
41 tolerance. Thus, the activity of the selective adenosine A<sub>2A</sub> receptor antagonist was quite  
42 different from that of the non-selective.

43

44

45 **Keywords:** selective A<sub>2A</sub> adenosine receptor antagonist, caffeine, obesity, inflammation,  
46 vascular permeability, interleukine-6

47

48

49

50

51 *1. Introduction*

52 Obesity is defined as over-storage of lipids in adipose tissue that occurs when the amount of  
53 supplied energy significantly exceeds its consumption by the body [1]. Currently, it is an  
54 extremely important civilization problem, since obesity is considered a risk factor for  
55 cardiovascular diseases (e.g. ischemic heart disease, hypertension, heart failure, stroke),  
56 diabetes, dyslipidemia, autoimmune diseases and even cancer [2]. The reasons for overweight  
57 (and obesity) are numerous and varied. Genetic, environmental and/or social factors as well as  
58 the hormonal status of the body play the major role in its pathogenesis [3]. According to the  
59 current theory, development of obesity, associated with adipocyte hypertrophy and  
60 hyperplasia, is connected not only with disturbances in the secretory function of the fat tissue,  
61 but also with increased inflammatory activation of adipocytes, release of pro-inflammatory  
62 cytokines and dysregulation of adipokine secretion [4 ,5 ,6 ,7]. An increase in the levels of  
63 pro-inflammatory cytokines and proteins such as interleukin-6 (IL-6), tumor necrosis factor  
64 alpha (TNF- $\alpha$ ), leptin or C-reactive protein (CRP) in both blood and adipose tissue itself was  
65 observed as obesity progressed. On the other hand, reduced levels of anti-inflammatory  
66 factors for instance adiponectin [8] as well as various changes (increase or decrease) in IL-10  
67 levels together with the mostly unchanged levels of IL-8 [9, 10] seem to be also relevant.  
68 Until now, the mechanism triggering inflammatory activation of adipose tissue has not been  
69 clearly defined. Different theories point to the role of hypoxia of adipocytes [11], cellular  
70 stress during obesity development [12], and elevated glucose level, all generating large  
71 amounts of free oxygen radicals in adipocytes and stimulating pro-inflammatory cytokines  
72 secretion [13, 14].

73 Pharmacological treatment of obesity remains an unresolved problem. The role of adenosine  
74 receptor signalling in the development and progression of numerous diseases has been  
75 emphasized for years. Adenosine is an endogenous purine nucleoside that participates in the

76 development of obesity [15]. It works through adenosine receptors such as  $A_1$ ,  $A_{2A}$ ,  $A_{2B}$  and  
77  $A_3$  that differ in their pharmacological profile (including affinity for adenosine), tissue  
78 localization and the system of second order messengers. Adenosine receptors are widely  
79 expressed in organs and tissues involved in metabolism regulation such as liver, pancreas,  
80 adipose tissue and muscles, moreover its presence on immune cells [16], points to their  
81 significant role in the inflammatory processes. Since all of these receptors are engaged in  
82 glucose homeostasis, adipogenesis, insulin resistance, inflammation and thermogenesis,  
83 treatment with specific agonist and/or antagonists could normalize several mechanisms  
84 involved in pathophysiology of obesity [17].

85 The  $A_{2A}$  receptor being the most abundant adenosine receptor in human and murine white and  
86 brown adipose tissue, as well as on immune cells and organs has become a potential target for  
87 obesity studies [16, 18]. Data indicate that adenosine signalling via  $A_{2A}$  is required for  
88 activation of brown adipose tissue and protects mice from diet-induced obesity [19]. It has  
89 been also demonstrated that  $A_{2A}$  receptor knockout mice exhibit impaired thermogenesis,  
90 oxygen consumption, and lipolysis [20]. Moreover, Csóka et al., (2017) observed the reduced  
91 food intake in such mice and consequently a lower body mass as compared to control animals  
92 [21]. A strong functional interaction between the dopamine  $D_2$  and adenosine  $A_{2A}$  receptors  
93 [22] has been further discovered and a blockade of adenosine  $A_{2A}$  receptor can even mimic  
94 the action of  $D_2$  agonists [23]. Since dopamine is known to be an important regulator of  
95 energy expenditure [24, 25] and food intake [26] reduced dopamine signal transduction may  
96 give rise to overeating and decreased energy consumption, both of which contribute to the  
97 positive energy balance seen in obesity [27].

98 The adenosine  $A_{2A}$  receptor is predominantly expressed on inflammatory cells, including  
99 neutrophils, mast cells, macrophages, monocytes, and platelets [28] and in many animal  
100 studies it has been demonstrated that its activation reduced inflammatory processes [28, 29]

101 and improved molecular markers of inflammation. On the other hand, it has been shown that  
102 the direct local injection of the selective  $A_{2A}$  receptor antagonist ZM 241385 in carrageenan-  
103 induced inflammatory hyperalgesia reduced inflammatory hypersensitivity suggesting that  
104 activation of peripheral adenosine  $A_{2A}$  receptors during inflammation is associated with  
105 mechanical hyperalgesia [30, 31] presented the series of  $A_{2A}$  adenosine receptor ligands with  
106 significant anti-inflammatory activity in carrageenan-induced paw edema model. These  
107 compounds have similar structure to KD-64 – ligand we have used in the presented study.  
108 For comparison purposes caffeine was chosen, a non-selective  $A_1$  and  $A_{2A}$  adenosine  
109 antagonist and the most popular and well-studied methylxantine which has been reported as  
110 thermogenic and lipolysis stimulator leading to fat oxidation in adipocytes and release of  
111 glycerol and fatty acids to the bloodstream [32, 33]. Moreover, caffeine modulates glucose  
112 metabolism and increases energy expenditure, as well as has impact on [34] body fat  
113 reduction [35] and weight loss [36] mostly as adjuvant agent [37, 38] especially during  
114 physical exercise or when administered simultaneously with the calorie restriction diets [39  
115 ,40].

116 While non-selective adenosine  $A_1$  and  $A_{2A}$  receptor antagonists such as caffeine are well  
117 investigated in obesity-related mechanisms, the results of studies on selective  $A_{2A}$  receptor  
118 antagonists are still inconsistent, therefore we have chosen for our experiments a selective  
119  $A_{2A}$  receptor antagonist, designated as KD-64, with significant selectivity over other  
120 adenosine receptors ( $K_i$  [ $\mu$ M] values are 0.24, > 25, > 10 and > 10 for  $A_{2A}$ ,  $A_1$ ,  $A_{2B}$  and  
121  $A_3$  receptors, respectively) [41].

122 In the first part of our research we have estimated the effect of KD-64 on the inflammation in  
123 the carrageenan or zymosan induced models of inflammation. Further, in a diet-induced mice  
124 obesity model, we have confirmed the development of inflammation, and compared the

125 effects of investigated compound and caffeine, i.e. selective and non-selective A<sub>2A</sub> receptor  
126 antagonists, on the primary metabolic variables.

## 127 *2. Materials and Methods*

### 128 *2.1. Animals*

129 Adult male Albino Swiss mice, CD-1, weighing 25–30 g were used in the inflammatory  
130 models and estimation of locomotor activity and adult female Albino Swiss mice, CD-1,  
131 weighing 19–22 g were used in the model of obesity. Animals were kept in environmentally  
132 controlled rooms, in standard cages lit by an artificial light for 12h each day. They had free  
133 access to food and water, except for the time of the acute experiment. The randomly  
134 established experimental groups consisted of 8 mice. All animal care and experimental  
135 procedures were carried out in accordance with European Union and Polish legislation acts  
136 concerning animal experimentation, and were approved by the Local Ethics Committee at the  
137 Jagiellonian University in Cracow, Poland (Permission No: 256/2015 and 55/2017).

### 138 *2.2. Drugs, chemical reagents and other materials*

139 Ketoprofen was used as standard anti-inflammatory compound and was purchased from  
140 Sigma-Aldrich (Poland). Carrageen was purchased from FCM Corporation (USA), Zymozan  
141 A and Evans blue from Sigma-Aldrich (Poland), Caffeine (used as standard in obese model)  
142 was purchased from Alfa-Aesar (Poland). KD-64 (Figure 1) [42] was synthesized in the  
143 Department of Technology and Biotechnology of Drugs, Faculty of Pharmacy, Jagiellonian  
144 University Medical College, Cracow, Poland. NMR and LC-MS techniques assessed identity  
145 and purity of final product. In all experiments ketoprofen, caffeine or KD-64 were  
146 administered as suspensions in 1% Tween 80.

### 147 **Fig 1. Chemical structure of compound KD-64**

148

### 149 *2.3. Inflammation models*

150 *2.3.1. Carrageenan-Induced Edema Model*

151 To induce inflammation, 0.1 ml of 1% carrageenan solution in water was injected into the  
152 hind paw subplantar tissue of mice, according to the modified method of C. A. Winter and P.  
153 Lence [43, 44], as described previously [45]. The development of paw edema was measured  
154 with a plethysmometr (Plethysmometr 7140, Ugo Basile). Prior to the administration of the  
155 tested substances (KD-64 or ketoprofen), paw diameters were measured and data were  
156 recorded for further comparison. The KD-64 compound was administered at the doses of 1, 5  
157 or 10 mg/kg, intraperitoneal (*ip*), prior to carrageenan injection, similarly ketoprofen  
158 (reference standard) was administered at the dose of 5 mg/kg [46]. 1% Tween 80 (vehicle)  
159 was administered by the same route to the control group (it had no effect on edema, data not  
160 shown). Results were presented as changes in the hind paw volume 3 h after carrageenan  
161 administration. Immediately, after measurement mice were administrated 2500 units/mice of  
162 heparin *ip* and 20 minutes later sacrificed by decapitation. Blood was collected to the  
163 Eppendorf tubes and centrifuged at 600 x g (15 min, 4°C) in order to obtain plasma used for  
164 the determination of CRP levels.

165 *2.3.2. Zymosan A induced peritoneal inflammation*

166 Peritoneal inflammation was induced as described previously [47]. Zymosan A was freshly  
167 prepared (2 mg/ml) in sterile 0.9% NaCl and 30 minutes after *ip* injection of the investigated  
168 compounds (KD-64 or ketoprofen at the dose of 5 mg/kg), zymosan A was injected via the  
169 same route. Four hours later the animals were killed by decapitation and blood was collected  
170 into a heparin-containing tubes. After centrifugation mice plasma was stored for the further  
171 measurements of the CRP levels. The peritoneal cavity was lavaged with 1.5 ml of PBS and  
172 after 30s of gentle manual massaging the exudates were retrieved. Cells were counted using  
173 an optical microscope (DM1000, Leica) and Bürker hemocytometer following staining with  
174 Turk's solution.

175 2.3.3. *Vascular permeability*

176 In the control studies Evans blue was suspended in the saline (10 mg/ml) and injected  
177 intravenously (*iv*) into the caudal vein, which was immediately followed by *ip* injection of  
178 zymosan A. Thirty minutes later the animals were killed by decapitation and their peritoneal  
179 cavities were lavaged with 1.5 ml of saline as described above. The lavage fluid was  
180 centrifuged and the absorbance of the supernatant was measured at 620 nm in order to assess  
181 vascular permeability by peritoneal leakage of *iv* injected Evans blue as described previously  
182 [47]. In the subsequent experiments KD-64, ketoprofen (reference standard) both at the dose  
183 of 5 mg/kg or vehicle (administered *sc*, control group) were injected *ip* 30 min before Evans  
184 blue and zymosan A. Further procedures were the same as in the control group.

185 2.4. *Locomotor activity*

186 The locomotor activity was recorded with an Opto M3 multichannel activity monitor  
187 (MultiDevice Software v1.3, Columbus Instruments, USA). It was evaluated as the distance  
188 travelled by the animals while attempting to climb upward [48]. After *ip* administration of  
189 KD-64 compound at the doses of 1, 5 or 10 mg/kg, each mouse was placed in a cage for a 30  
190 minutes habituation period. After that time the number of crossings of photo beams was  
191 measured for 20 minutes.

192 2.5. *Obesity study*

193 2.5.1. *Metabolic disturbance induced with a high-fat/sucrose diet and its influence on body*  
194 *weight and spontaneous activity*

195 Mice were fed on high-fat diet consisting of 40% fat blend (Labofeed B with 40% lard,  
196 Morawski Feed Manufacturer, Poland) for 15 weeks, water and 30% sucrose solution were  
197 available *ad libitum* [49, 50]. Control mice were fed on a standard diet (Labofeed B,  
198 Morawski Feed Manufacturer, Poland) and drank water only. After 12 weeks, mice with  
199 obesity were randomly divided into three equal groups that had the same mean body weight



200 and were treated *ip* with tested compounds at the following doses: KD-64 5 mg/kg b.w./day  
201 or caffeine 50 mg/kg b.w./day and control group: 1% Tween 80 (vehicle) 0.35 ml/kg  
202 (fat/sugar diet + vehicle = obesity control group) once daily between 9:00 and 10:00 AM for  
203 21 days. Control mice (control without obesity) were maintained on a standard diet, with *ip*  
204 administration of 1% Tween 80, 0.35 ml/kg (standard diet + vehicle = control group).  
205 Animals always had free access to feed, water and sucrose. After experiment mice were killed  
206 by decapitation and plasma was harvested to determine levels of TNF- $\alpha$ , IL-6 and activity of  
207 alanine aminotransferase (AlaT).

208 High-fat feed composition (932 g of dry mass): protein – 193 g, fat (lard) – 408 g, fiber – 28.1  
209 g, crude ash – 43.6 g, calcium – 9.43 g, phosphorus – 5.99 g, sodium – 1.76 g, sugar – 76 g,  
210 magnesium – 1.72 g, potassium – 7.62 g, manganese – 48.7 mg, iodine – 0.216 mg, copper –  
211 10.8 mg, iron – 125 mg, zinc – 61.3 mg, cobalt – 0.253 mg, selenium – 0.304 mg, vitamin A –  
212 15000 units, vitamin D3 – 1000 units, vitamin E – 95.3 mg, vitamin K3 - 3.0 mg, vitamin B1  
213 – 8.06 mg, vitamin B2 – 6.47 mg, vitamin B6 – 10.3 mg, vitamin B12 – 0.051 mg, folic acid –  
214 2.05 mg, nicotinic acid – 73.8 mg, pantothenic acid – 19.4 mg, choline – 1578 mg.

215 The high-fat diet contained 550 kcal and the standard diet 280 kcal per 100 g.

216 The spontaneous activity of mice was measured on the 1<sup>st</sup> and 21<sup>st</sup> day of the treatment with a  
217 special RFID-system – TraffiCage (TSE-Systems, Germany). The animals were  
218 subcutaneously implanted with a radio-frequency identifier (RFID), which enabled to  
219 count the presence and time spent in different areas of the cage. The obtained data was  
220 grouped using an appropriate computer program [48].

## 221 *2.6. Biochemical analysis*

### 222 *2.6.1. Glucose tolerance test*

223 The glucose tolerance test was performed at the beginning of 16<sup>th</sup> week. After twenty  
224 administrations of the tested compounds (KD-64 or caffeine), food and sucrose were

225 discontinued for 20h and then glucose tolerance was tested. Glucose (1g/kg b.w.) was  
226 administrated *ip* [49, 50] and blood samples were taken from the tail vein at the time points: 0  
227 (before glucose administration), 30, 60 and 120 minutes after administration. Glucose levels  
228 were measured with glucometer (ContourTS, Bayer, Germany, test stripes: ContourTS,  
229 Ascensia Diabetes care Poland Sp. z o.o., Poland, REF:84239666). The area under the curve  
230 (AUC) was calculated using the trapezoidal rule.

### 231 *2.6.2. Insulin tolerance test*

232 Insulin tolerance was tested on the next day after the glucose tolerance test. Mice had free  
233 access to standard food and water, but 3h before insulin tolerance test the food was taken  
234 away. Insulin (0.5 IU/kg b.w.) was injected *ip* and blood samples were collected at the time  
235 points: 0, 15 and 30 minutes from the tail vein and glucose levels were measured with  
236 glucometer (ContourTS, Bayer, Germany, test stripes: ContourTS, Ascensia Diabetes care  
237 Poland Sp. z o.o., Poland, REF:84239666) [49, 50]. The AUC was calculated using the  
238 trapezoidal rule.

### 239 *2.6.3. Plasma levels of IL-6, TNF- $\alpha$ , CRP and AlaT activity*

240 On the next day after insulin tolerance test, 20 minutes after *ip* administration of heparin  
241 (2500 units/mice) animals were sacrificed by decapitation. The blood was collected and then  
242 centrifuged at 600 x g (15 min, 4°C) in order to obtain plasma. To determine AlaT activity in  
243 the plasma samples, standard enzymatic spectrophotometric test (Biomaxima S.A. Lublin,  
244 Poland, catalogue number: 1-023-0150) was used. In order to quantify IL-6 and TNF- $\alpha$   
245 LANCE® Ultra Detection Kits (PerkinElmer, Inc, USA, catalogue numbers: TRF1505,  
246 TRF1504C/TRF1504M) were used. For the determination of CRP standard enzymatic  
247 spectrophotometric tests (Shanghai Sunred Biological Technology Co., Ltd, China, catalogue  
248 number: 201-02-0219) were applied.

### 249 *2.6. Statistical analysis*

250 The obtained results were analyzed using a one-way variance analysis (ANOVA), followed  
251 by a Dunnett post-hoc test, with the significance level set at 0.05 (locomotor activity, AlaT  
252 activity, IL-6 or TNF- $\alpha$  levels,), a two-way variance analysis (ANOVA), followed by a  
253 Bonferroni post-hoc test (changes in body weight) or a Multi-t test (glucose tolerance test,  
254 insulin tolerance test, spontaneous activity). The results were expressed as the means  $\pm$   
255 standard error of the mean (SEM). Graph Pad Prism 6.0 was used for data analysis.

### 256 3. Results

#### 257 3.1. Influence of KD-64 on spontaneous activity

258 Compound KD-64 did not affect spontaneous activity in mice after single intraperitoneal  
259 administration at all tested doses. The results are shown in Figure 2.

#### 260 **Fig 2. Locomotor activity after a single administration of KD-64**

261 Results are mean  $\pm$  SEM, n=6. Comparisons were performed using one-way ANOVA  
262 Dunnet's post hoc test.

263

#### 264 3.2. Influence of KD-64 on carrageenan-induced paw edema in mice

265 The mouse paw became edematous after the injection of carrageenan, and in the control group  
266 edema reached a peak at 3h (increase by 97.7% of the initial volume). The increase in paw  
267 edema was significantly inhibited by the KD-64 administration at a dose of 5 mg/kg b.w. as  
268 compared to the control group, which was given carrageenan and vehicle only (Figure 3A).  
269 Since the results were comparable to the ones observed in the group receiving ketoprofen, 5  
270 mg/kg b.w. of KD-64 (as an active dose) has been selected for further studies. In the plasma  
271 of mice treated with KD-64 significant decrease in CRP level (similar to the one observed  
272 after ketoprofen administration) was also determined (Figure 3B).

273 **Fig 3. Anti-inflammatory effects of the tested compounds in the carrageenan-induced**  
274 **paw edema test**

275 (A) Changes in the paw volume in 3h after drug administration in relation to the initial  
276 volume (before carrageenan injection). Results are mean  $\pm$  SEM, n=8. Comparisons were  
277 performed using one-way ANOVA Dunnet's post hoc test. \* Significant against control mice  
278 administered carrageenan; \*p<0.05. (B) Concentration of C-reactive protein in plasma.  
279 Results are mean  $\pm$  SEM, n=8. Comparisons were performed by t-Student test. \* Significant  
280 against control mice, ^ Significant against control mice administered carrageenan; \*p<0.05,  
281 ^^p<0.01, ^^^p<0.001.

282

### 283 *3.3. Influence of KD-64 on Zymosan A induced peritoneal inflammation and vascular* 284 *permeability*

285 The early infiltration of neutrophils measured at 4h after zymosan-induced peritonitis was  
286 significantly inhibited in the group receiving KD-64 at the dose of 5 mg/ kg b.w. as compared  
287 to the control group, which was given zymosan A alone and leucocytosis was comparable to  
288 the one measured after ketoprofen administration (Figure 4A). CRP concentration in mice  
289 plasma was also decreased in the group receiving KD-64, interestingly levels of CRP after  
290 ketoprofen administration did not change significantly (Figure 4B). The early vascular  
291 permeability measured at 30 min after zymosan-induced peritonitis was significantly inhibited  
292 in the group receiving KD-64 compared to the control group, which was given zymosan A  
293 alone (Figure 4C). After ketoprofen administration vascular permeability also decreased  
294 however it was still significantly higher than in control group without induced peritoneal  
295 inflammation. Thus, in both experiments KD-64 administered at the same dose as ketoprofen  
296 exerted stronger effect than reference compound.

297 **Fig 4. Anti-inflammatory effects of the tested compounds in model of zymosan-induced**  
298 **peritonitis in mice**

299 (A) Neutrophil infiltration during zymosan-induced peritonitis in mice, (B) Concentration of  
300 C-reactive protein in plasma, (C) Vascular permeability. Results are mean  $\pm$  SEM, n=8.  
301 Comparisons were performed by t-Student test. \* Significant against control mice, ^  
302 Significant against control mice administered zymosan. \*, ^p<0.05, \*\*, ^^p<0.01, \*\*\*p<0.001.

303

#### 304 *3.4. Influence of KD-64 on body weight and peritoneal fat*

305 Mice fed with high-fat/sugar diet showed more weight gain throughout the 12-week period of  
306 inducing obesity as compared to the control group. Animals fed with high-fat diet and treated  
307 with KD-64 at the dose of 5 mg/kg b.w. showed significantly less weight gain than mice from  
308 the obese control group, however only during the first week of administration. From the  
309 second week of KD-64 administration the difference wasn't significant. Mice from the group  
310 receiving caffeine (50 mg/kg b.w./day, *ip*) starting from the first week of treatment gained  
311 less weight compared to the control group and at the end of the experiment weighed  
312 significantly less. The results are shown in Figures 5A and 5B. Animals consuming high-fat  
313 feed had also significantly higher amount of fat in peritonea. The results are shown in Figure  
314 5C.

#### 315 **Fig 5. Effect of administration of KD-64 or caffeine on body weight and mass of adipose** 316 **pads**

317 (A) Percent change of body weight during the administration. (B) Sum of weight changes. (C)  
318 Mass of adipose pads. Results are expressed as means  $\pm$  SEM, n=8. Multiple comparisons  
319 were performed by two-way ANOVA, Bonferroni's post hoc (A) or one-way ANOVA  
320 Dunnet's post hoc tests (B, C). ^ Significant against control mice fed fat/sugar diet; \*  
321 Significant against control mice fed standard diet; ^p<0.05, ^^p<0.01, \*\*\*, ^^p<0.001.

322

#### 323 *3.5. Influence of KD-64 on plasma IL-6 and TNF- $\alpha$ levels in obese mice*

324 In obese control mice higher plasma levels of IL-6 and TNF- $\alpha$  were observed than in control  
325 standard fed mice. However, they were significantly lowered by the administration of KD-64  
326 for 21 days at the dose of 5 mg/kg b.w./day and were similar to the values observed in control  
327 non-obese mice (Figure 6). Interestingly, caffeine increased the levels of these parameters,  
328 and they were significantly higher not only vs. levels in standard fed control group but also  
329 vs. obese control group.

330 **Fig 6. Effect of administration of KD-64 or caffeine on TNF- $\alpha$  (A) and IL-6 (B) levels in**  
331 **plasma**

332 Results are expressed as means  $\pm$  SEM, n=8. Comparisons were performed by one-way  
333 ANOVA Dunnet's post hoc test. \* Significant against control mice fed standard diet; ^  
334 Significant against control mice fed fat/sugar diet; \*, ^ p<0.05, \*\*, ^ p<0.01.

335

336 *3.6. Influence of KD-64 on AlaT activity in obese mice*

337 Activity of AlaT in plasma of obese mice was significantly higher than in standard diet fed  
338 control mice. Administration of caffeine had no influence on AlaT activity, surprisingly KD-  
339 64 at the tested dose of 5 mg/kg significantly lowered AlaT levels in obese mice (Figure 7).

340 **Fig 7. Effect of administration of KD-64 or caffeine on alanine aminotransferase activity**  
341 **in plasma**

342 Results are expressed as means  $\pm$  SEM, n=8. Comparisons were performed by one-way  
343 ANOVA Dunnet's post hoc test. \* Significant against control mice fed standard diet, ^  
344 Significant against control mice fed fat/sugar diet; \*, ^ p<0.05.

345

346 *3.7. Glucose tolerance and insulin sensitivity after KD-64 treatment of obese mice*

347 At 30 minutes after glucose load the blood glucose levels of mice in all tested groups  
348 receiving high fat diet were similar and significantly higher as compared to the levels

349 determined in control standard diet fed mice. At the subsequent time points (60 and 120  
350 minutes after glucose load) there was no statistical difference observed between glucose blood  
351 levels of standard diet fed mice and high fat diet fed mice treated with KD-64 or caffeine.  
352 Interestingly, at the last time point (120 minutes after glucose load) glucose levels determined  
353 only in mice treated with KD-64 compound were similar to the levels observed in control  
354 standard diet fed mice and significantly lower than in control obese mice. Results are shown  
355 in Figure 8A. At the same time, as shown in Figure 8B, the AUC was decreased by KD-64  
356 treatment at the dose of 5 mg/kg b.w. as compared to both obese control group and group  
357 treated with caffeine, however it was still higher than in control standard diet fed group.

### 358 **Fig 8. Glucose tolerance test**

359 (A) Intraperitoneal glucose tolerance test (IPGTT), (B) area under the curve of IPGTT.  
360 Results are expressed as means  $\pm$  SEM, n=8. Comparisons were performed by Multi-t test. \*  
361 Significant between control mice fed standard diet and control mice fed fat/sugar diet, ^  
362 Significant between control mice fed standard diet and mice fed fat/sugar diet and treated with  
363 KD-64, & Significant between control mice fed standard diet and mice fed fat/sugar diet and  
364 treated with caffeine, \$ Significant between control mice fed fat/sugar diet and mice fed  
365 fat/sugar diet and treated with KD-64; \$p<0.05, \*\*\*, ^^^, &&&p<0.001.

366  
367 In the insulin test, neither KD-64 nor caffeine affected blood glucose levels, which were  
368 similar in all tested groups (Figure 9).

### 369 **Fig 9. Insulin sensitivity test**

370 (A) Insulin tolerance test (ITT), (B) area under the curve of the ITT. Results are expressed as  
371 means  $\pm$  SEM, n=8. Comparisons were performed by Multi-t test.

372  
373 *3.8. Influence of KD-64 on spontaneous activity*

374 Compound KD-64 at the tested dose did not affect spontaneous activity in obese mice after a  
375 single *ip* administration, but spontaneous activity decreased during certain hours after  
376 twentieth administration vs. spontaneous activity in control group. Caffeine, on the other  
377 hand, increased spontaneous activity during certain hours after both first and twentieth *ip*  
378 administration of the tested dose. The results are shown in Figure 10.

379 **Fig 10. Spontaneous activity after the first (A) and twentieth (B) administration of tested**  
380 **compounds**

381 Results are expressed as means  $\pm$  SEM, n=8. Comparisons were performed by Multi-t test. \*  
382 Significant between control mice fed fat/sugar diet and mice fed fat/sugar diet and treated  
383 with KD-64, # Significant between control mice fed fat/sugar diet and mice fed fat/sugar diet  
384 and treated with caffeine; \*#p<0.05, \*\*,##p<0.01.

385  
386 *4. Discussion*

387 The A<sub>2</sub> adenosine receptors play an important role in regulation of glucose homeostasis in  
388 both diabetes and obesity, but they also take active part in the inflammatory processes and  
389 these two particular abilities of A<sub>2</sub> adenosine receptors were a subject of the presented study.  
390 In the obesity model we have tested activity of the new selective antagonist of A<sub>2A</sub> adenosine  
391 receptor – compound KD-64 and compared its effect to the known non-selective antagonist of  
392 adenosine receptors – caffeine. Subsequently in two different inflammation models the  
393 activity of KD-64 has been compared to the activity of potent anti-inflammatory agent –  
394 ketoprofen.

395 From the available literature it is known that caffeine – non-selective adenosine A<sub>2A</sub> receptor  
396 antagonist is able to inhibit various obesity-related abnormalities, including low metabolism,  
397 adiposity, dyslipidemia, systemic/tissue inflammation, and insulin resistance [51]. Thus, we



398 began to wonder whether the selective adenosine A<sub>2A</sub> receptor antagonist may have similar  
399 properties – especially when it comes to inflammation and obesity?

400 For research, the selective A<sub>2A</sub> adenosine receptor antagonist KD-64 has been chosen, which  
401 in previous studies, administered at the dose of 5 mg/kg b.w., exerted antiparkinsonian  
402 activity [52]. Preliminary experiments aimed at the determination of spontaneous and anti-  
403 inflammatory activities after a single administration of the tested compound. The purpose of  
404 this study was to select the lowest dose of KD-64 compound that has anti-inflammatory  
405 activity, but simultaneously does not influence spontaneous activity so it can be administered  
406 chronically in the obesity model. In obesity studies it is particularly important that the tested  
407 compounds do not increase activity, which could further contribute to an increase in energy  
408 consumption and an undesirable effect of the psyche - agitation. On the other hand, it is also  
409 important that the tested compounds do not reduce activity, because sedation, for example,  
410 may cause a decrease in food intake and consequently weight loss that could be attributed as a  
411 non-specific effect. Such effect will also be unacceptable in chronic therapy since chronic  
412 fasting can be harmful to the body. Therefore, for the safe and effective compounds tested in  
413 obesity models and with potential action towards reducing body weight, it is crucial to have  
414 no effect on spontaneous activity [53]. In the case of presented studies it is especially  
415 important since adenosine, through A<sub>1</sub> and A<sub>2A</sub> receptors, is involved in the regulation of  
416 spontaneous activity [54, 55]. It has been reported that adenosine A<sub>2A</sub> agonists, e.g. the CGS  
417 21680 compound, can cause sedation [56], while antagonists of this receptor, e.g. caffeine,  
418 have a stimulating effect [57].

419 Our research showed that the selective A<sub>2A</sub> receptor antagonist KD-64 did not induce changes  
420 in spontaneous activity after a single administration therefore we proceeded with the further  
421 experiments. In models of both local and systemic inflammation the anti-inflammatory effect  
422 of the KD-64 compound administered at a dose of 5 mg/kg b.w./day was comparable to the

423 anti-inflammatory effect of ketoprofen (5 mg/kg b.w./day) used as a reference standard. There  
424 are reports in the literature that pharmacological blockade of selected adenosine receptor  
425 subtypes (PSB-36, PSB-1115, MSX-3, and PSB-10) after systemic application of antagonists  
426 generally leads to decrease in edema formation after the carrageenan injection [58]. In the  
427 case of  $A_{2A}$  antagonist, activity of the drug varies with time, suggesting that the importance of  
428 adenosine receptor activation in the inflammatory process dynamically changes in the course  
429 of inflammation [58]. The local injection of the highly  $A_{2A}$ -selective agonist CGS21680  
430 induced paw edema, conversely [59]  $A_{2A}$  antagonist MSX-3, at a dose of 10 mg/kg b.w.,  
431 significantly reduced the carrageenan-induced edema [58]. Similarly, in our study, we showed  
432 that intraperitoneal injection of selective  $A_{2A}$  receptor antagonist KD-64 at a dose of 5 mg/kg  
433 b.w./day, results in a potent inhibition of carrageenan-induced edema formation (Figure 3).  
434 Thus, the results obtained are in line with literature reports and clearly show that selective  $A_{2A}$   
435 receptor antagonists have anti-inflammatory effect.

436 Adenosine may be added to the growing list of key signalling molecules that regulate vascular  
437 function and homeostasis and to a very selected list of agonists that promote integrity of the  
438 vascular bed [60]. There are reports in the literature that adenosine regulates the pulmonary  
439 endothelial cells barrier function via  $A_{2A}$  receptors [60] and through its influence on the  
440 adenosine receptors  $A_1$  and  $A_{2A}$  can modulate for example blood-brain barrier permeability  
441 [61]. Blocking just the adenosine  $A_{2A}$  receptor reduces permeability and blocks the entry of  
442 inflammatory cells and soluble factors into the brain [61]. It has been also reported that  
443 vascular permeability in the hind plantar skin of rats decreases following lumbar  
444 sympathectomy, possibly via reduction of adenosine receptor  $A_{2A}$  expression [62]. In the  
445 second model of inflammation used in the presented study i.e. zymosan-induced peritonitis,  
446 KD-64 showed significant anti-inflammatory effect, manifested by decrease of both vascular  
447 permeability, and plasma neutrophils count. The results were comparable to the ones obtained

448 after ketoprofen administration. It is an important finding, confirming that A<sub>2A</sub> adenosine  
449 receptor blockade may be directly responsible for a decrease in vascular permeability.  
450 Anti-inflammatory effect of KD-64 was also evaluated through the measurement of CRP  
451 levels - an acute phase protein primarily expressed and secreted by the liver. In response to  
452 tissue injury or infection, the plasma concentrations of CRP can increase rapidly, moreover  
453 CRP level also increases in chronic inflammatory diseases, including cardiovascular and  
454 autoimmune disease. Due to the correlation between CRP and inflammation, CRP has  
455 attracted wide attention as a non-specific marker used for purpose of evaluation and  
456 monitoring of the infection and inflammation development as well as a prognostic marker for  
457 cardiovascular events [63]. In both models of inflammation, the tested antagonist of A<sub>2A</sub>  
458 adenosine receptors KD-64 statistically significantly reduced the level of CRP in plasma. This  
459 confirms the anti-inflammatory efficacy of this compound after its *ip* administration at a dose  
460 of 5 mg/kg b.w./day.

461 Based on the described above findings the dose of 5 mg/kg b.w./day of KD-64 was selected  
462 for testing in mice obesity model. During the first days of KD-64 administration, obese  
463 animals weighed significantly less compared to the obese control mice. But then they began  
464 to gain weight at the rate comparable to obese control mice. Not surprisingly, the amount of  
465 peritoneal adipose tissue, measured at the end of the experiment, was comparable in these two  
466 groups of animals. It is interesting, however, that the group receiving caffeine at a dose of 50  
467 mg/kg/ b.w./day which gained weight significantly less than obese control mice (results  
468 consistent with the literature findings) [64] at the end of the experiment had the amount of  
469 peritoneal fat also comparable to the other experimental groups.

470 As the compound KD-64 was administered, its effectiveness in reducing weight of obese mice  
471 was decreasing. Unfortunately, the conducted research does not provide an assessment of why  
472 this might have happened. More detailed investigation is needed to determine if, for example,

473 it was due to changes in the number and sensitivity of adenosine receptors with repeated  
474 administrations. Literature reports such cases that repeated administrations of adenosine  $A_{2A}$   
475 ligands may lead to the changes in regulation (both up- or down-regulation) of the  $A_{2A}$   
476 adenosine receptor gene [65]. In addition, various pathological conditions can cause changes  
477 in the density of  $A_{2A}$  adenosine receptors, for example it has been shown that pro-  
478 inflammatory stimuli up-regulate  $A_{2A}$  adenoside receptor and for the effective treatment  
479 appropriately higher doses of ligands are required [66]. A reduction in DNA methylation at  
480 the  $A_{2A}$  adenosine receptor gene promoter site and an increase in the protein levels and gene  
481 expression in binge-like-eating rats has been also reported [65]. Interestingly, alterations of  
482 DNA methylation of  $A_{2A}$  adenosine receptor has been observed in other diseases such as  
483 schizophrenia (67), Huntington's disease [68] and cardiomyopathies [69].

484 Studies of spontaneous activity in obese mice showed that repeated administration of KD-64  
485 led to a decrease in spontaneous activity at some hours after the twentieth administration of  
486 this compound. As previously mentioned, adenosine  $A_{2A}$  agonists, e.g. the CGS 21680  
487 compound, can cause sedation [56], which may indicate that in fact a change in receptor  
488 density and sensitivity (up-regulation) after repeated administration of KD-64 could be the  
489 cause of such observation.

490 In obesity, the white adipose tissue produces large numbers of inflammatory agents including  
491  $TNF-\alpha$  and IL-6, which can affect the physiology of the adipose tissue locally, but also may  
492 induce systemic effects on the other organs [70]. IL-6 has emerged as one of the mediators  
493 linking obesity-derived chronic inflammation with insulin resistance. In high fat diet fed  
494 obese mice, activated hepatic IL-6 signalling is accompanied by systemic and local insulin  
495 resistance, which can be reversed by neutralization of IL-6 [71]. Indeed, in our study, the  
496 levels of  $TNF-\alpha$  and IL-6 in the plasma of obese mice were higher as compared to control  
497 non-obese mice and were significantly reduced by the administration of KD-64. This

498 reduction in the levels of inflammatory cytokines is probably the result of the anti-  
499 inflammatory effect of the tested compound. It should be emphasized that these tests were  
500 made with homogeneous, very sensitive and reliable methods. In addition, in the glucose load  
501 test, significant differences were observed in the response curve in group which received KD-  
502 64 treatment compared to the obese control group. The glucose level in mice treated with KD-  
503 64 one hour after loading did not differ statistically from the level determined in non-obese  
504 mice fed standard feed. This indicates an improvement in glucose tolerance in KD-64-treated  
505 mice compared to the obese control mice which might be connected to the anti-inflammatory  
506 effect of the tested compound and a decrease in plasma IL-6 levels, since IL-6 and its  
507 signalling path play complex roles in metabolic disorders [72]. It was recently reported that  
508 IL-6 enhances fatty acid synthesis in murine hepatocytes via the induction of the citrate  
509 transporter *mIndy* [73] and it also exacerbates hepatic inflammation and steatosis [74].  
510 Additionally, adenosine has been shown to promote IL-6 production [75] and our study  
511 demonstrates that adenosine  $A_{2A}$  receptor may be associated with this activity, because  
512 selective antagonist of this particular receptor decreased IL-6 level in plasma. In contrast,  
513 several human studies reported that despite the well-proven anti-inflammatory effect of  
514 caffeine [77, 78, 79], its administration, leads to an increase in serum IL-6 levels [79, 80]. The  
515 results of our study, even though performed on mice, are in line with these observations.  
516 Observed in our studies differences in plasma IL-6 levels between the caffeine and KD-64  
517 treatment groups may indicate that decrease in IL-6 concentration is due not only to the anti-  
518 inflammatory effect of the KD-64 compound, but also adenosine  $A_{2A}$  receptor blockade. This  
519 is an interesting topic that undoubtedly requires further research.

520 Another interesting and very favourable result of KD-64 treatment is its ability to normalize  
521 the elevated AlaT activity, induced by high-fat/sugar feeding. Liver is a vital organ involved  
522 in detoxification and drug metabolism, therefore potential hepatotoxicity could eliminate the

523 test compound from further stages of development especially if it is intended for longer use.  
524 In our experiment caffeine did not have any effect on AlaT levels, although there are reports  
525 in the literature that in the obesity model caused by the administration of high-fat feed,  
526 caffeine administered for several weeks at the dose of 20-40 mg/kg in the drinking water  
527 normalizes liver enzymes [65]. Probably this effect depends also on the dose and time of  
528 caffeine administration.  
529 In conclusion, after repeated administrations of a selective A<sub>2A</sub> adenosine receptor antagonist  
530 compound KD-64 with documented anti-inflammatory activity, no significant reduction in  
531 weight gain was observed in obese mice fed high-calorie feed. However, contrary to caffeine  
532 (non-selective adenosine receptor antagonist) investigated compound normalized levels of  
533 selected cytokines and inflammatory proteins, including IL-6, as well as, activity of alanine  
534 transaminase and improved glucose tolerance in the obese mice. Thus our findings prove that  
535 the activity of the selective adenosine A<sub>2A</sub> receptor antagonist is different from that of the  
536 non-selective antagonist.

### 537 *5. Acknowledgments*

538 The authors wish to gratefully acknowledge Maria Kaleta and Joanna Knutelska for their  
539 technical assistance.

540 *6. Conflict of Interest:* The authors declare that they have no conflict of interest.

### 541 *7. References*

- 542 1. Shoelson SE, Herrero L, Naaz A. Obesity, inflammation and insulin resistance.  
543 *Gastroenterology*. 2007;132:2169-2180.
- 544 2. Saltiel AR, Olefsky JM. Inflammatory mechanisms linking obesity and metabolic disease. *J*  
545 *Clin Invest*. 2017;127:1-4.
- 546 3. Lee EB, Mattson MP. The neuropathology of obesity: Insights from human disease. *Acta*  
547 *Neuropathologica*. 2014;127:3-28.

- 548 4. Trayhurn P. Adipose tissue in obesity - An inflammatory issue. *Endocrinology*.  
549 2005;146:1003-1005.
- 550 5. Ouchi N, Parker JL, Lugus JJ, Walsh K. Adipokines in inflammation and metabolic  
551 disease. *Nature Reviews Immunology*. 2011;11,85–97.
- 552 6. Fernández-Sánchez A, Madrigal-Santillán E, Bautista M, Esquivel-Soto J, Morales-  
553 González A, Esquivel-Chirino C, et al. Inflammation, oxidative stress, and obesity. *Int J Mol*  
554 *Sci*. 2011;12:3117-3132.
- 555 7. Ellulu MS, Patimah I, Khaza'ai H, Rahmat A, Abed Y. Obesity and inflammation: The  
556 linking mechanism and the complications. *Arch Med Sci*. 2017;13(4):851-863.
- 557 8. Arita Y, Kihara S, Ouchi N, Takahashi M, Maeda K, Miyagawa JI, et al. Paradoxical  
558 decrease of an adipose-specific protein, adiponectin, in obesity. *Biochem Biophys Res*  
559 *Commun*. 1999;57:79-83.
- 560 9. Azizian M, Mahdipour E, Mirhafez SR, Shoeibi S, Nematy M, Esmaily H, et al. Cytokine  
561 profiles in overweight and obese subjects and normal weight individuals matched for age and  
562 gender. *Ann Clin Biochem*. 2016;53:663-668.
- 563 10. Leon-Cabrera S, Arana-Lechuga Y, Esqueda-León E, Terán-Pérez G, Gonzalez-Chavez  
564 A, Escobedo G. Reduced Systemic levels of IL-10 are associated with the severity of  
565 obstructive sleep apnea and insulin resistance in morbidly obese humans. *Mediators Inflamm*.  
566 2015;2015:493409. doi: 10.1155/2015/493409
- 567 11. Trayhurn P, Wood IS. Adipokines: inflammation and the pleiotropic role of white adipose  
568 tissue. *Br J Nutr*. 2004;92:347-355.
- 569 12. Gregor MF, Hotamisligil GS. Thematic review series: Adipocyte Biology. Adipocyte  
570 stress: the endoplasmic reticulum and metabolic disease. *J Lipid Res*. 2007;48:1905–1914.
- 571 13. Nathan C. Epidemic inflammation: pondering obesity. *Moi Med*. 2008;14:485-492.
- 572 14. Giri B, Dey S, Das T, Sarkar M, Banerjee J, Dash SK. Chronic hyperglycemia mediated

- 573 physiological alteration and metabolic distortion leads to organ dysfunction, infection, cancer  
574 progression and other pathophysiological consequences: An update on glucose toxicity.  
575 *Biomed and Pharmac.* 2018;107:306-328
- 576 15. Cully M. Obesity: Adenosine protects from diet-induced obesity. *Nat Rev Drug Discov.*  
577 2014;13:886–887.
- 578 16. Haskó G, Linden J, Cronstein B, Pacher P. Adenosine receptors: Therapeutic aspects for  
579 inflammatory and immune diseases. *Nature Reviews Drug Discovery.* 2008;7:759-770.
- 580 17. Pardo F, Villalobos-Labra R, Chiarello DI, Salsoso R, Toledo F, Gutierrez J, et al.  
581 Molecular implication of adenosine in obesity. *Mol Aspect Medicine.* 2017;55: 90-101.
- 582 18. Haskó G, Pascher P. A<sub>2A</sub> receptors in inflammation and injury: lessons learned from  
583 transgenic animals. *J Leukoc Biol.* 2008;83:447–455.
- 584 19. Gnad T, Scheibler S, Kugelgen, Scheele C, Ana Kilic, Glo A, et al. Adenosine activates  
585 brown adipose tissue and recruits beige adipocytes via A<sub>2A</sub> receptors. *Nature.* 2014;516:395-  
586 399.
- 587 20. Yaar R, Jones MR, Chen JF, Ravid K. Animal models for the study of adenosine receptor  
588 function. *J Cell Physiol.* 2005;202:9-20.
- 589 21. Csóka B, Törő G, Vindeirinho J, Varga ZV, Koscsó B, Németh ZH, et al. A<sub>2A</sub> adenosine  
590 receptors control pancreatic dysfunction in high-fat-diet-induced obesity. *FASEB J.*  
591 2017;31:4985-4997.
- 592 22. Fink JS, Weaver DR, Rivkees SA, Peterfreund RA, Pollack AE, Adler EM. Molecular  
593 cloning of the rat A<sub>2</sub> adenosine receptor: selective co-expression with D<sub>2</sub> dopamine receptors  
594 in rat striatum. *Mol Brain Res.* 1992;14:185-195.
- 595 23. Fenu S, Pinna A, Ongini E, Morelli M. Adenosine A<sub>2A</sub> receptor antagonism potentiates  
596 L-DOPA-induced turning behaviour and c-fos expression in 6-hydroxydopamine-lesioned  
597 rats. *Eur J Pharmacol.* 1997;321:143-147.



- 598 24. Cincotta AH, Tozzo E, Scislowski PW. Bromocriptine/SKF38393 treatment ameliorates  
599 obesity and associated metabolic dysfunctions in obese (ob/ob) mice. *Life Sci.* 1997;61:951-  
600 956.
- 601 25. Scislowski PWD, Tozzo E, Zhang Y, Phaneuf S, Prevelige R, Cincotta AH. Biochemical  
602 mechanisms responsible for the attenuation of diabetic and obese conditions in ob/ob mice  
603 treated with dopaminergic agonists. *Int J Obes.* 1999;23:425-431.
- 604 26. Bina KG, Cincotta A. Dopaminergic agonists normalize elevated hypothalamic  
605 neuropeptide Y and corticotropin-releasing hormone, body weight gain, and hyperglycemia in  
606 ob/ob mice. *Neuroendocrinology.* 2000;71:68-78.
- 607 27. Davis CA, Levitan RD, Reid C, Carter JC, Kaplan AS, Patte KA, et al. Dopamine for  
608 “waiting” and opioids for “liking” a comparison of obese adults with and without binge  
609 eating. *Obes (Silver Spring).* 2009;17:1220-1225.
- 610 28. Reece TB, Ellman PI, Maxey TS, Crosby IK, Warren PS, Chong TW, et al. Adenosine  
611 A<sub>2A</sub> receptor activation reduces inflammation and preserves pulmonary function in an in vivo  
612 model of lung transplantation. *J Thorac Cardiovasc Surg.* 2005;129:1137-1143.
- 613 29. Sharma AK, Linden J, Kron IL, Laubach VE. Protection from pulmonary ischemia-  
614 reperfusion injury by adenosine A<sub>2A</sub> receptor activation. *Respir Res.* 2009 Jun 26;10:58. doi:  
615 10.1186/1465-9921-10-58.
- 616 30. Li L, Hao JX, Fredholm BB, Schulte G, Wiesenfeld-Hallin Z, Xu XJ. Peripheral  
617 adenosine A<sub>2A</sub> receptors are involved in carrageenan-induced mechanical hyperalgesia in  
618 mice. *Neuroscience.* 2010;170:923-928.
- 619 31. Zygmunt M, Gołombiowska K, Drabczyńska A, Kieć-Kononowicz K, Sapa J. Anti-  
620 inflammatory, antioxidant, and antiparkinsonian effects of adenosine A<sub>2A</sub> receptor antagonists.  
621 *Pharmacol Biochem Behav.* 2015;132:71-78.

- 622 32. Carrageta DF, Dias TR, Alves MG, Oliveira PF, Monteiro MP, Silva BM. Anti-obesity  
623 potential of natural methylxanthines. *J of Func Foods*. 2018;43:84–94.
- 624 33. Dulloo AG. The search for compounds that stimulate thermogenesis in obesity  
625 management: From pharmaceuticals to functional food ingredients. *Obes Rev*. 2011;12:866-  
626 883.
- 627 34. Lopes-Silva JP, Ferreira Da Silva Santos J, Branco BHM, Abad CCC, Farias De Oliveira  
628 L, Loturco I. Caffeine ingestion increases estimated glycolytic metabolism during taekwondo  
629 combat simulation but does not improve performance or parasympathetic reactivation. *PLoS*  
630 *One*. 2015;5:1-16.
- 631 35. Bakuradze T, Parra GAM, Riedel A, Somoza V, Lang R, Dieminger N, et al. Four-week  
632 coffee consumption affects energy intake, satiety regulation, body fat, and protects DNA  
633 integrity. *Food Res Int*. 2014;63:420–427.
- 634 36. Lopez-Garcia E, Van Dam RM, Rajpathak S, Willett WC, Manson JAE, Hu FB. Changes  
635 in caffeine intake and long-term weight change in men and women. *Am J Clin Nutr*.  
636 2006;83:674-680.
- 637 37. Liu AG, Smith SR, Fujioka K, Greenway FL. The effect of leptin, caffeine/ephedrine, and  
638 their combination upon visceral fat mass and weight loss. *Obesity*. 2013;314:433–447.
- 639 38. Liu AG, Arceneaux KP, Chu JT, Jacob G, Schreiber AL, Tipton RC, et al. The effect of  
640 caffeine and albuterol on body composition and metabolic rate. *Obesity*. 2015;23:1830-1835.
- 641 39. Davoodi SH, Hajimiresmaiel SJ, Ajami M, Mohseni-Bandpei A, Ayatollahi SA,  
642 Dowlathahi K, et al. Caffeine treatment prevented from weight regain after calorie shifting  
643 diet induced weight loss. *Iran J Pharm Res*. 2014;13:707–718.
- 644 40. Schubert MM, Hall S, Leveritt M, Grant G, Sabapathy S, Desbrow B. Caffeine  
645 consumption around an exercise bout: Effects on energy expenditure, energy intake, and  
646 exercise enjoyment. *J Appl Physiol*. 2014;117:745-754.

- 647 41. Drabczyńska A, Yuzlenko O, Köse M, Paskaleva M, Schiedel AC, Karolak-  
648 Wojciechowska J, et al. Synthesis and biological activity of tricyclic cycloalkylimidazo-,  
649 pyrimido- and diazepinopurinediones. *Eur J Med Chem.* 2011;46:3590-3607.
- 650 42. Drabczyńska A, Zygmunt M, Sapa J, Filipek B, Müller CE, Kieć-Kononowicz K.  
651 Antiparkinsonian effects of novel adenosine A<sub>2A</sub> receptor antagonists. *Arch Pharm*  
652 *(Weinheim).* 2011;344:20-27.
- 653 43. Winter CA, Risley EA, Nuss GW. Carrageenin-Induced Edema in Hind Paw of the Rat as  
654 an Assay for Antiinflammatory Drugs. *Proc Soc Exp Biol Med.* 1962;111:544-547.
- 655 44. Yazawa K, Suga K, Honma A, Shirosaki M, Koyama T. Anti-inflammatory effects of  
656 seeds of the tropical fruit camu-camu (*Myrciaria dubia*). *J Nutr Sci Vitaminol (Tokyo).*  
657 2011;57:104-107.
- 658 45. Kwiecień B, Dudek B, Bilska-Wilkosz A, Knutelska J, Bednarski M, Kwiecień I, et al. In  
659 vivo Anti-inflammatory Activity of Lipoic Acid Derivatives in Mice. *Postepy Hig Med Dosw.*  
660 2013;67:331-338.
- 661 46. Nakamura T, Miyaoka K, Kuriyama H, Nishida M, Yamashita S, Okubo K, et al.  
662 Paradoxical decrease of an adipose-specific protein, adiponectin, in obesity. *Biochem*  
663 *Biophys Res Commun.* 1999;57:79-83.
- 664 47. Kołaczowska E, Barteczko M, Plytycz B, Arnold B. Role of lymphocytes in the course  
665 of murine zymosan-induced peritonitis. *Inflamm Res.* 2008;57:272-278.
- 666 48. Dudek M, Kuder K, Kołaczkowski M, Olczyk A, Żmudzka E, Rak A, et al. H3 histamine  
667 receptor antagonist pitolisant reverses some subchronic disturbances induced by olanzapine in  
668 mice. *Metab Brain Dis.* 2016;31:1023-1029.
- 669 49. Kotańska M, Kuder KJ, Szczepańska K, Sapa J, Kieć-Kononowicz K. The histamine H3  
670 receptor inverse agonist pitolisant reduces body weight in obese mice. *Naunyn*  
671 *Schmiedebergs Arch Pharmacol.* 2018;391:875-881.

- 672 50. Kotańska M, Mika K, Reguła K, Szczepańska K, Szafarz M, Bednarski M, et al. KSK19 -  
673 Novel histamine H3 receptor ligand reduces body weight in diet induced obese mice.  
674 *Biochem Pharmacol.* 2019;168:193-203.
- 675 51. Liu CW, Tsai HC, Huang CC, Tsai CY, Su YB, Lin MW, et al. Effects and mechanisms  
676 of caffeine to improve immunological and metabolic abnormalities in diet-induced obese rats.  
677 *Am J Physiol Endocrinol Metab.* 2018;314(5):433-447.
- 678 52. Drabczyńska A, Zygmunt M, Sapa J, Filipek B, Müller CE, Kieć-Kononowicz K.  
679 Antiparkinsonian effects of novel adenosine A(2A) receptor antagonists. *Arch Pharm*  
680 *(Weinheim).* 2011;344:20-27.
- 681 53. Dudek M, Marcinkowska M, Bucki A, Olczyk A, Kołaczkowski M. Idalopirdine – a small  
682 molecule antagonist of 5-HT<sub>6</sub> with therapeutic potential against obesity. *Metab Brain Dis.*  
683 2015;30:1487-1494.
- 684 54. Yacoubi M El, Ledent C, Ménard J-F, Parmentier M, Costentin J, Vaugeois JM. The  
685 stimulant effects of caffeine on locomotor behaviour in mice are mediated through its  
686 blockade of adenosine A<sub>2A</sub> receptors. *Br J Pharmacol.* 2000;129:1465-1473.
- 687 55. Stenberg D. Neuroanatomy and neurochemistry of sleep. *Cell Mol Life Sci* 2007;64:1187-  
688 1204
- 689 56. Mingote S, Pereira M, Farrar AM, McLaughlin PJ, Salamone JD. Systemic administration  
690 of the adenosine A<sub>2A</sub> agonist CGS 21680 induces sedation at doses that suppress lever  
691 pressing and food intake. *Pharmacol Biochem Behav.* 2008;89:345-351.
- 692 57. Bădescu SV, Tătaru CP, Kobylinska L, Georgescu EL, Zahiu DM, Zăgrea AM, et al.  
693 Effects of caffeine on locomotor activity in streptozotocin-induced diabetic rats. *J Med Life.*  
694 2016;9:275-279.
- 695 58. Bilkei-Gorzo A, Abo-Salem OM, Hayallah AM, Michel K, Müller CE, Zimmer A.  
696 Adenosine receptor subtype-selective antagonists in inflammation and hyperalgesia. *Naunyn*

- 697 Schmiedebergs Arch Pharmacol. 2008;377:65-67.
- 698 59. Sawynok J, Reid A, Liu XJ. Acute paw oedema induced by local injection of adenosine  
699 A<sub>1</sub>, A<sub>2</sub> and A<sub>3</sub> receptor agonists. Eur J Pharmacol. 1999;386:253-261.
- 700 60. Umapathy NS, Fan Z, Zemskov EA, Alieva IB, Black SM, Verin AD. Molecular  
701 mechanisms involved in adenosine-induced endothelial cell barrier enhancement. Vascul  
702 Pharmacol. 2010;52:199-206.
- 703 61. Bynoe MS, Viret C, Yan A, Kim DG. Adenosine receptor signaling: A key to opening the  
704 blood-brain door. Fluids and Barriers of the CNS. Fluids Barriers CNS. 2015;2:12-20.
- 705 62. Zheng Z, Liu Y, Zhu L, Tang J, Huang W, Cheng B. Lumbar sympathectomy reduces  
706 vascular permeability, possibly through decreased adenosine receptor A<sub>2a</sub> expression in the  
707 hind plantar skin of rats. Clin Hemorheol Microcirc. 2018;68:5-15.
- 708 63. Yao ZY, Zhang Y, Wu HB. Regulation of C-reactive protein conformation in  
709 inflammation. Inflamm Res. 2019;68:815-823.
- 710 64. Fang C, Cai X, Hayashi S, Hao S, Sakiyama H, Wang X, et al. Caffeine-stimulated  
711 muscle IL-6 mediates alleviation of non-alcoholic fatty liver disease. Biochim Biophys Acta -  
712 Mol Cell Biol Lipids. 2019;1864:271-280.
- 713 65. Micioni Di Bonaventura MV, Pucci M, Giusepponi ME, Romano A, Lambertucci C,  
714 Volpini R, et al. Regulation of adenosine A<sub>2A</sub> receptor gene expression in a model of binge  
715 eating in the amygdaloid complex of female rats. J Psychopharmacol. 2019;33:1550-1561
- 716 66. Alfaro TM, Rodrigues DI, Tomé ÂR, Cunha RA, Robalo Cordeiro C. Adenosine A<sub>2A</sub>  
717 receptors are up-regulated and control the activation of human alveolar macrophages. Pulm  
718 Pharmacol Ther. 2017;45:90-94.
- 719 67. Villar-Menéndez I, Díaz-Sánchez S, Blanch M, Albasanz JL, Pereira-Veiga T, Monje A.  
720 Reduced striatal adenosine A<sub>2A</sub> receptor levels define a molecular subgroup in schizophrenia.  
721 J Psychiatr Res. 2014;51:49-59.

- 722 68. Villar-Menéndez I, Blanch M, Tyebji S, Pereira-Veiga T, Albasanz JL, Martín M.  
723 Increased 5-methylcytosine and decreased 5-hydroxymethylcytosine levels are associated  
724 with reduced striatal A2AR levels in Huntington's disease. *NeuroMolecular Med.*  
725 2013;15:295-309.
- 726 69. Haas J, Frese KS, Park YJ, Keller A, Vogel B, Lindroth AM. Alterations in cardiac DNA  
727 methylation in human dilated cardiomyopathy. *EMBO Mol Med.* 2013;5:413-429.
- 728 70. Ye J. Mechanisms of insulin resistance in obesity. *Frontiers of Medicine in China.*  
729 2013;7:14-24.
- 730 71. Liu CW, Tsai HC, Huang CC, Tsai CY, Su YB, Lin MW, et al. Effects and mechanisms  
731 of caffeine to improve immunological and metabolic abnormalities in diet-induced obese rats.  
732 *Am J Physiol Endocrinol Metab.* 2018;314(5):433-447.
- 733 72. Ishihara K, Hirano T. IL-6 in autoimmune disease and chronic inflammatory proliferative  
734 disease. *Cytokine and Growth Factor Rev.* 2002;13:357-368.
- 735 73. von Loeffelholz C, Lieske S, Neuschäfer-Rube F, Willmes DM, Raschzok N, Sauer IM, et  
736 al. The human longevity gene homolog INDY and interleukin-6 interact in hepatic lipid  
737 metabolism. *Hepatology.* 2017;66:616-630.
- 738 74. Hong F, Radaeva S, Pan HN, Tian Z, Veech R, Gao B. Interleukin 6 alleviates hepatic  
739 steatosis and ischemia/reperfusion injury in mice with fatty liver disease. *Hepatology.*  
740 2004;40:933-941.
- 741 75. Sitaraman SV, Merlin D, Wang L, Wong M, Gewirtz AT, Si-Tahar M. Neutrophil-  
742 epithelial crosstalk at the intestinal luminal surface mediated by reciprocal secretion of  
743 adenosine and IL-6. *J Clin Invest.* 2001;107:861-869.
- 744 76. Chavez-Valdez R, Wills-Karp M, Ahlawat R, Cristofalo EA, Nathan A, Gauda EB.  
745 Caffeine modulates TNF- $\alpha$  production by cord blood monocytes: The role of adenosine  
746 receptors. *Pediatr Res.* 2009;65:203-308.

- 747 77. Lv X, Chen Z, Li J, Zhang L, Liu H, Huang C, et al. Caffeine protects against alcoholic  
748 liver injury by attenuating inflammatory response and oxidative stress. *Inflamm Res.*  
749 2010;59:635-645.
- 750 78. Iris M, Tsou PS, Sawalha AH. Caffeine inhibits STAT1 signaling and downregulates  
751 inflammatory pathways involved in autoimmunity. *Clin Immunol.* 2018;192:68-77.
- 752 79. Walker GJ, Finlay O, Griffiths H, Sylvester J, Williams M, Bishop NC. Immunoendocrine  
753 response to cycling following ingestion of caffeine and carbohydrate. *Med Sci Sports Exerc.*  
754 2007;39:1554-1560.
- 755 80. Tauler P, Martinez S, Moreno S, Monjo M, Martínez P, Aguiló A. Effects of caffeine on  
756 the inflammatory response induced by a 15-km run competition. *Med Sci Sports Exerc.*  
757 2013;45:1269–1276.

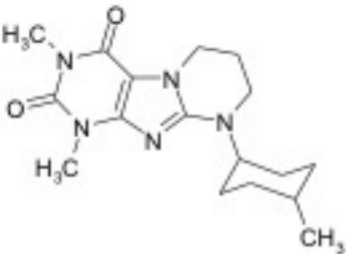

Figure 1



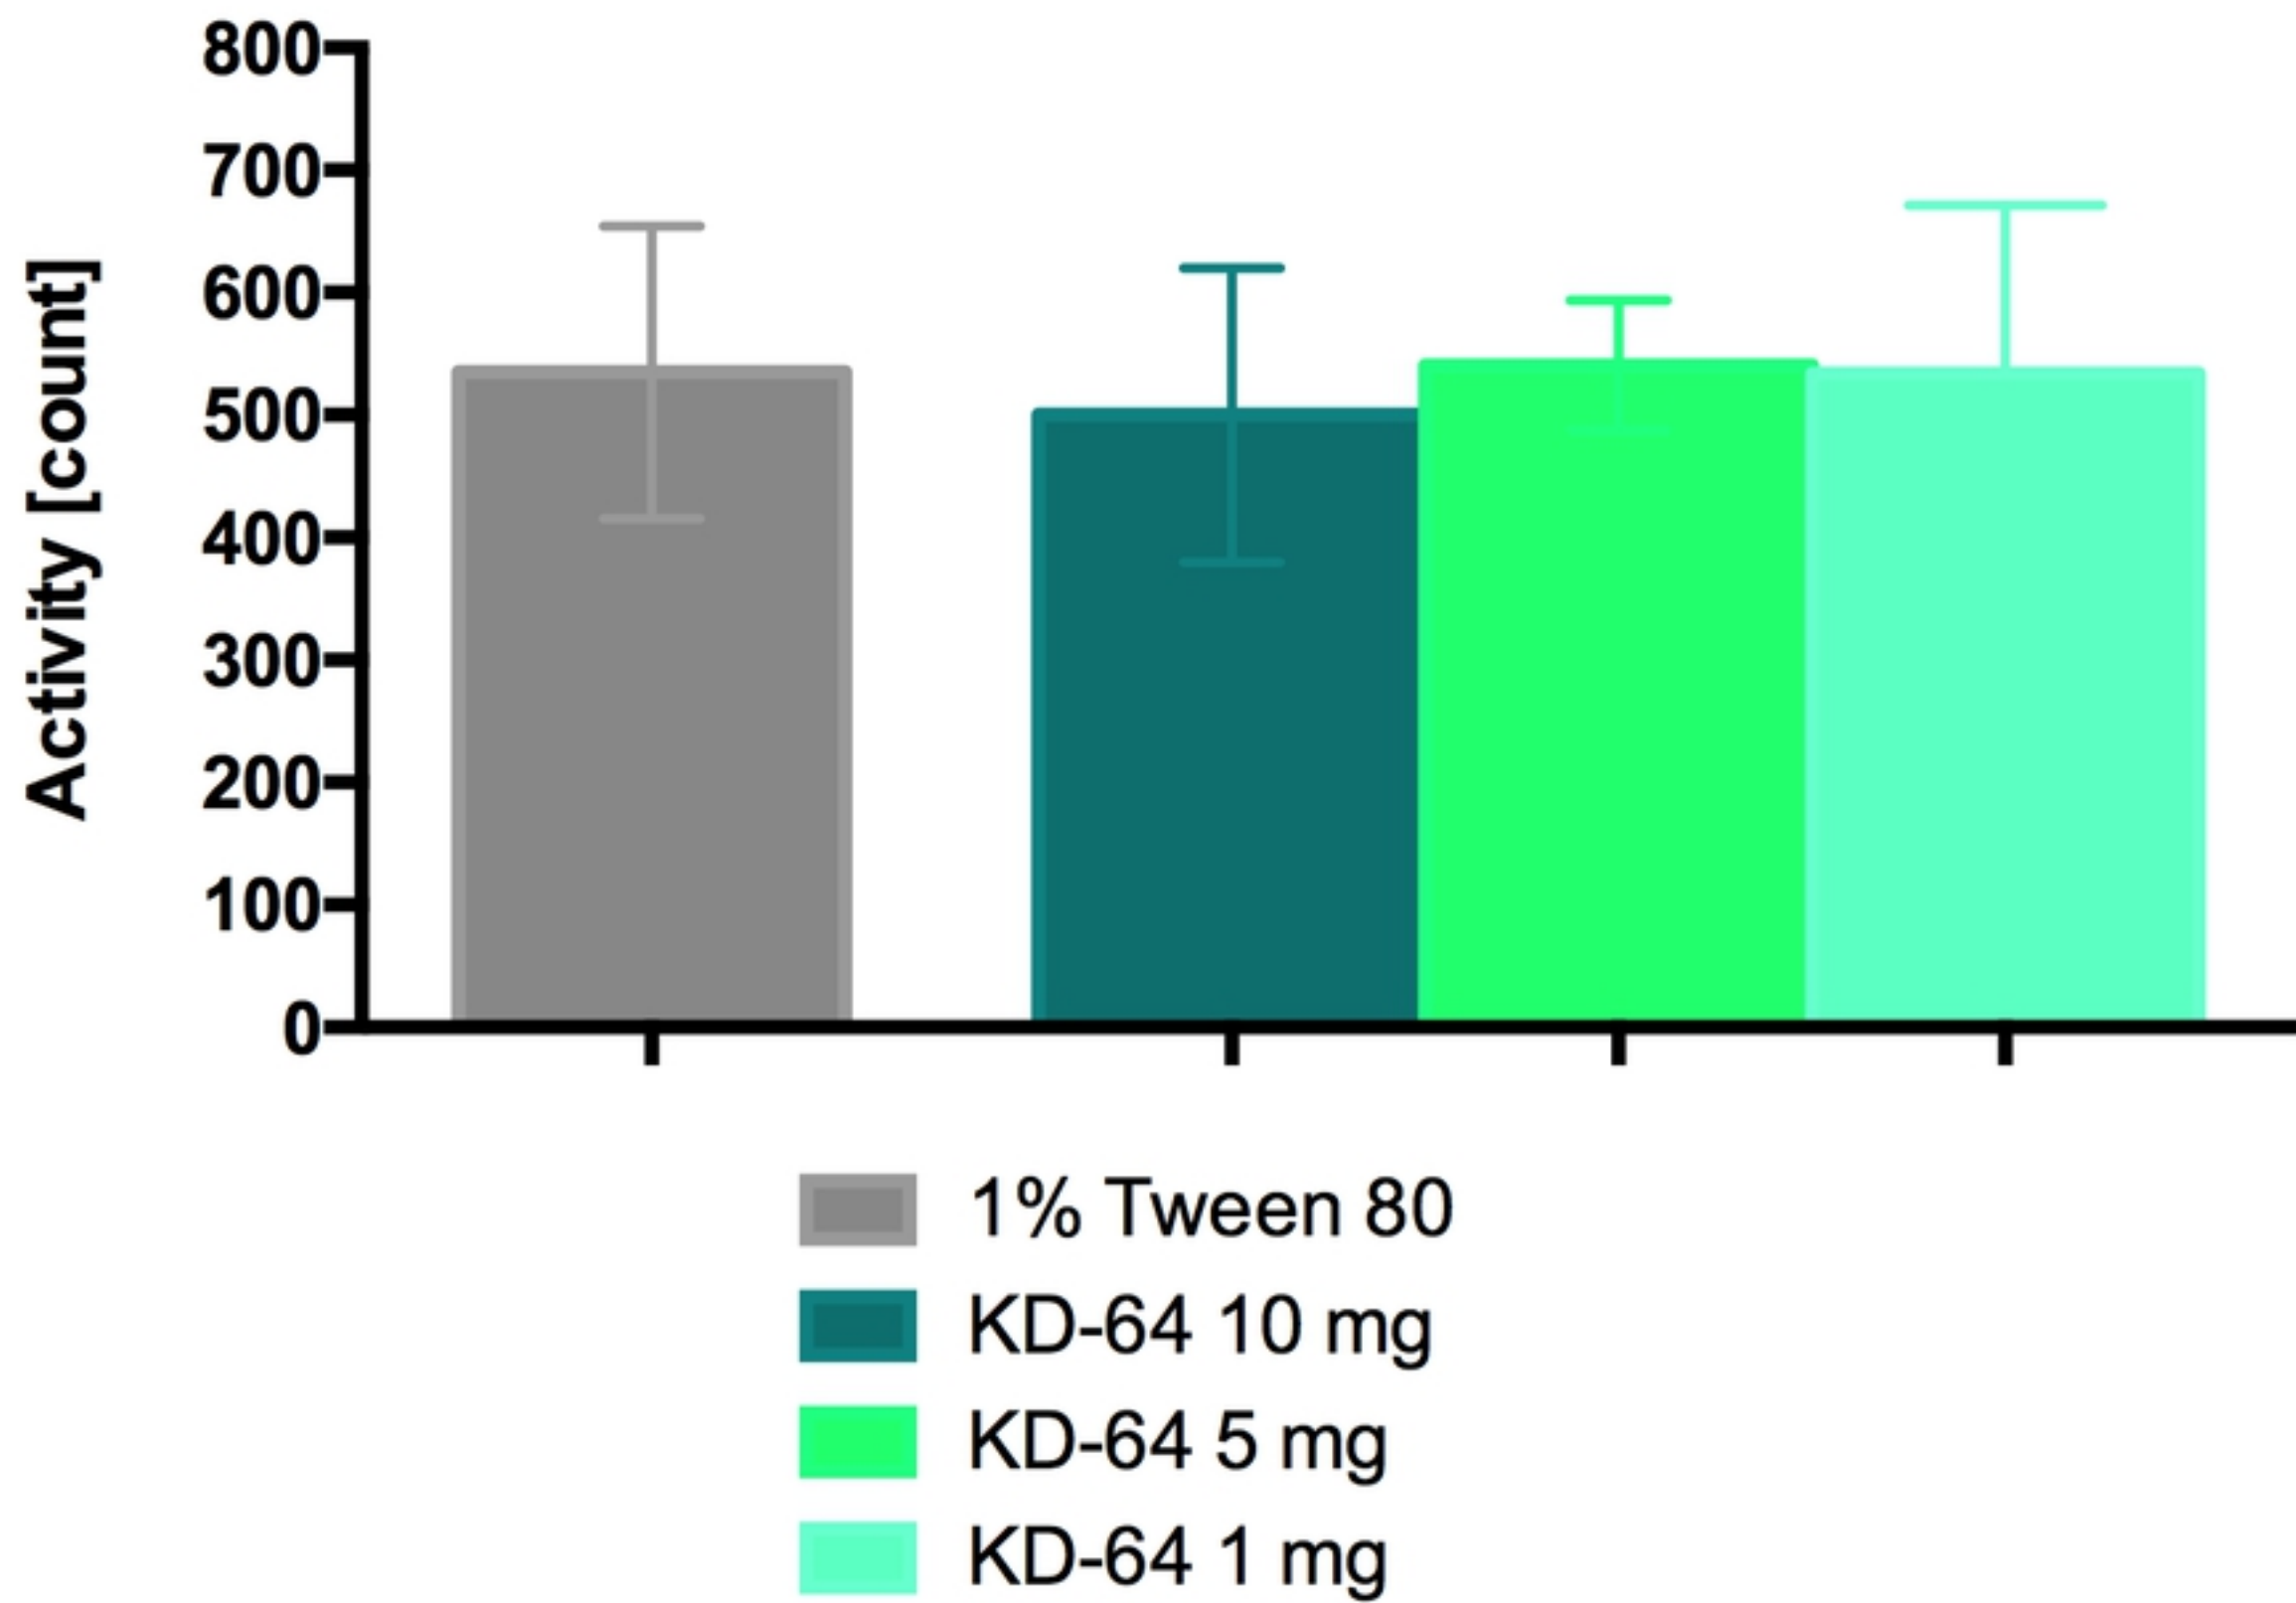

Figure 2

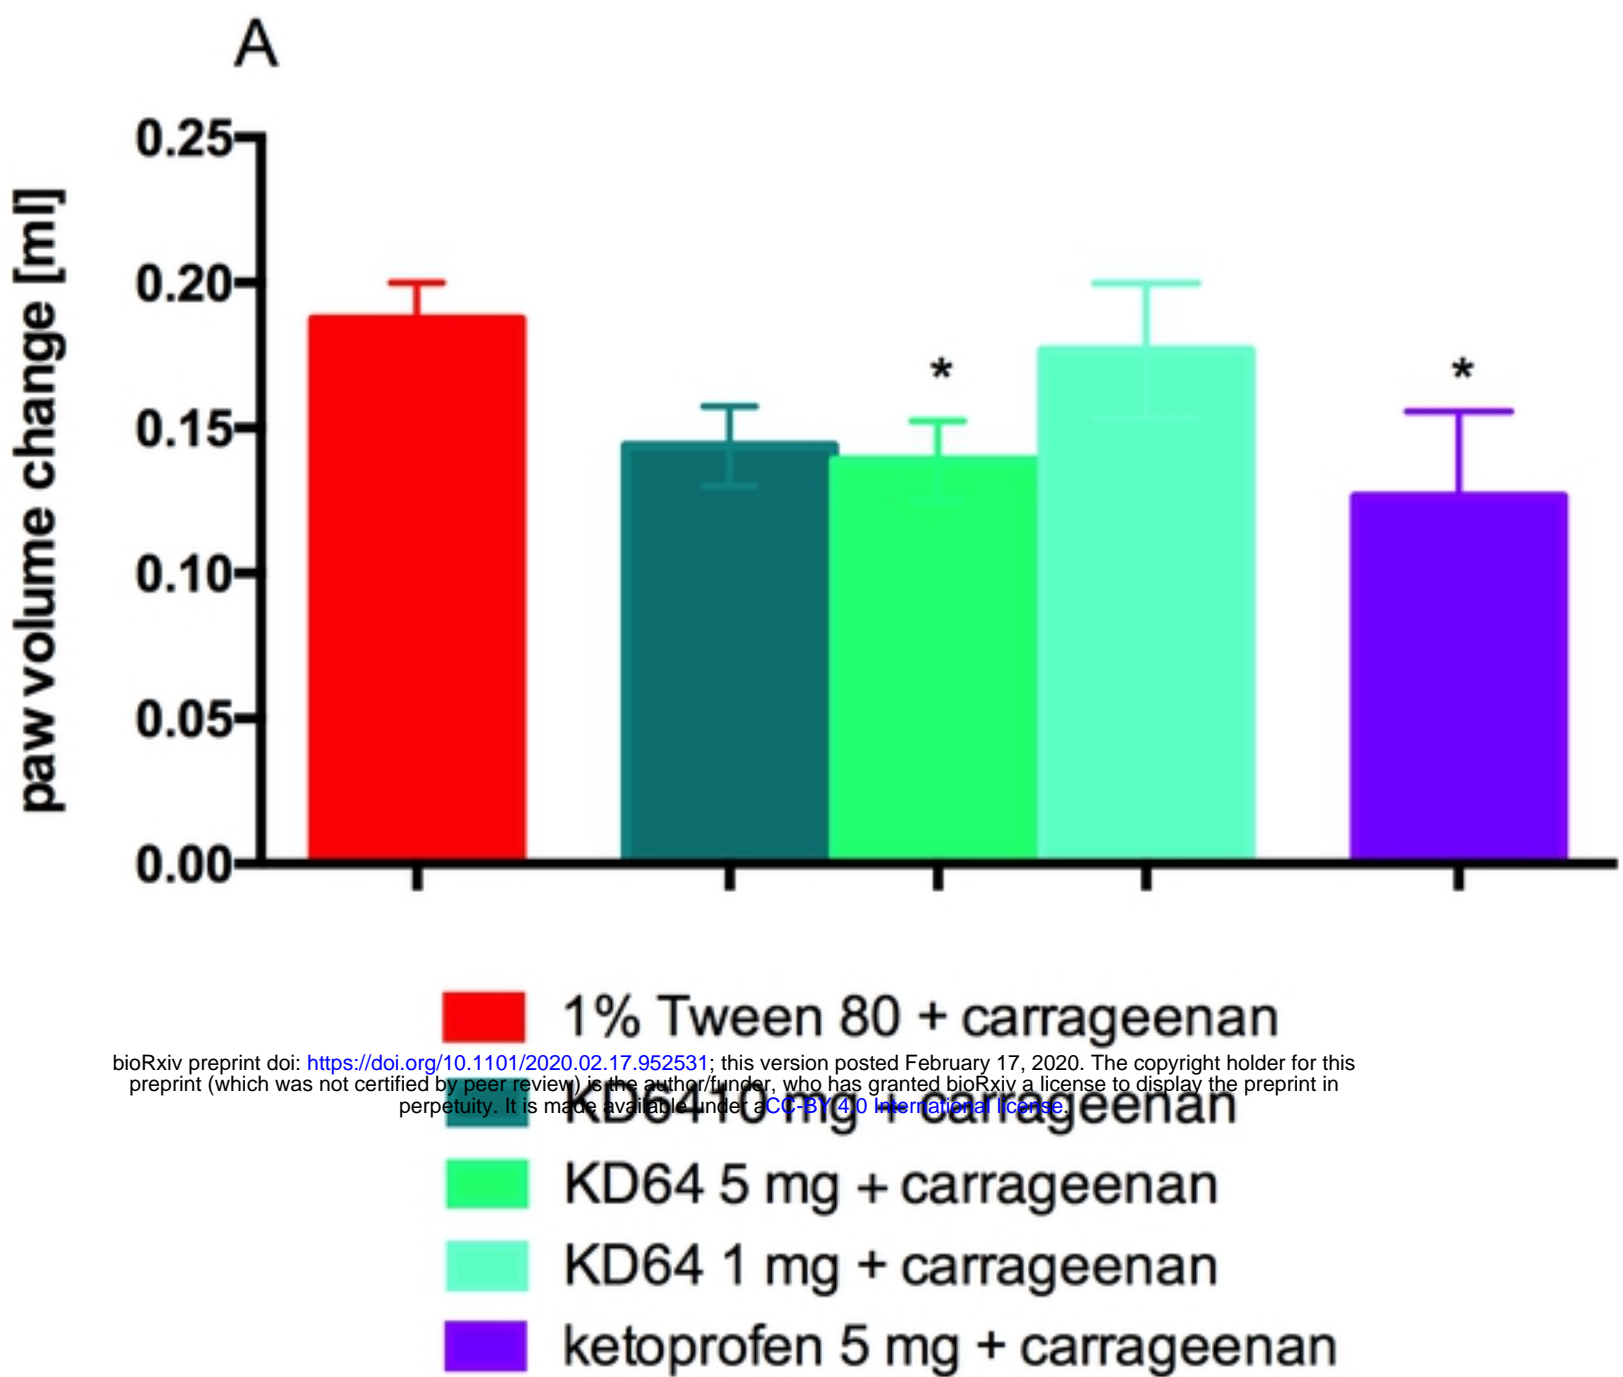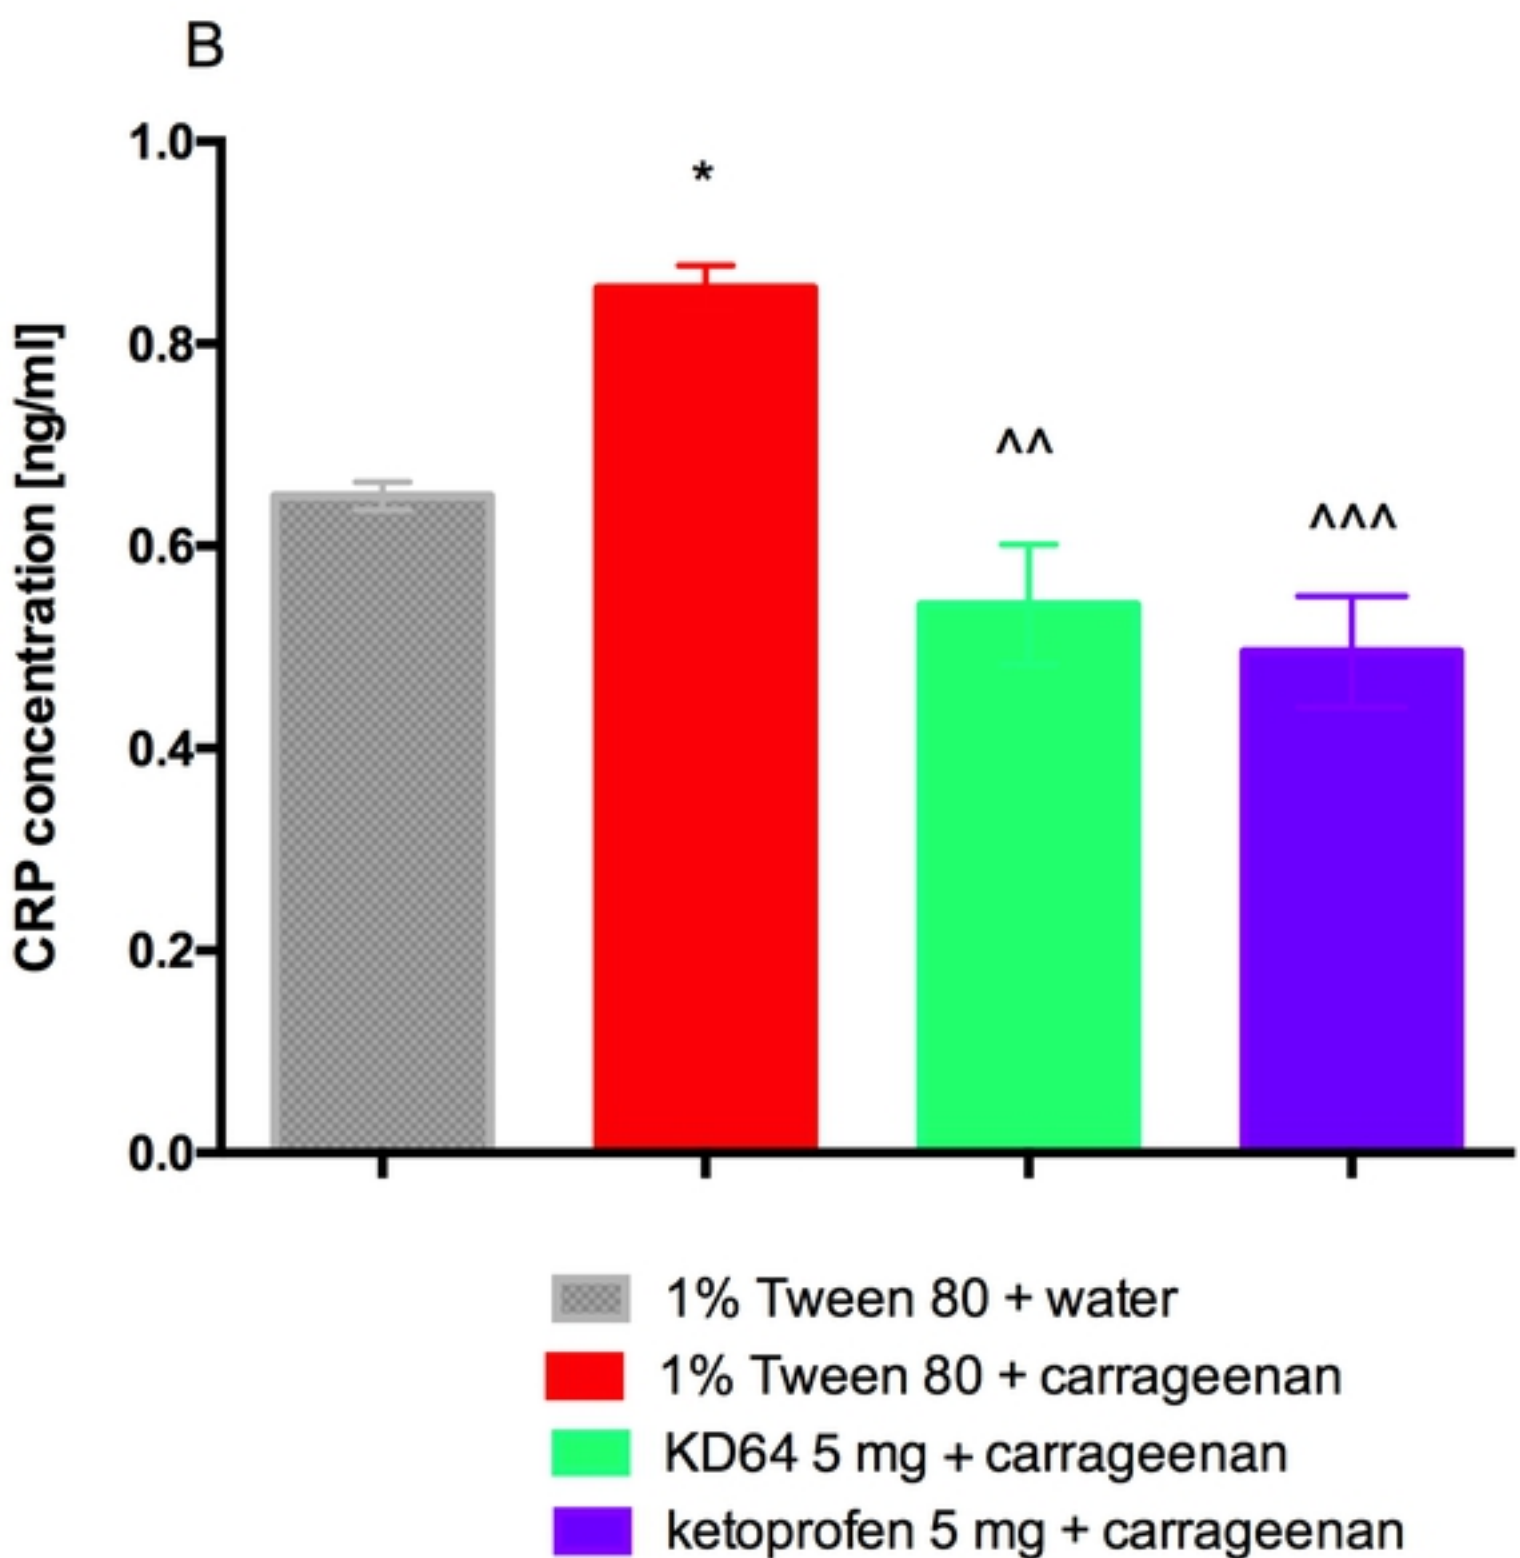

Figure 3

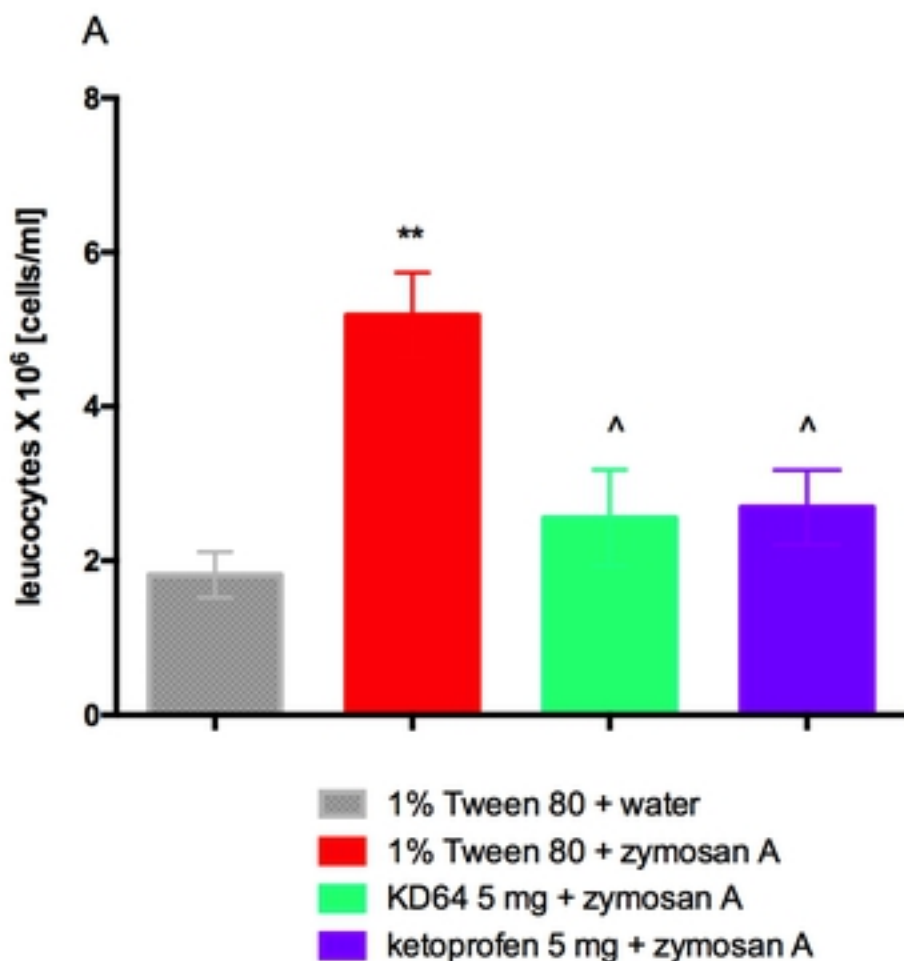

bioRxiv preprint doi: <https://doi.org/10.1101/2020.02.17.952531>; this version posted February 17, 2020. The copyright holder for this preprint (which was not certified by peer review) is the author/funder, who has granted bioRxiv a license to display the preprint in perpetuity. It is made available under aCC-BY 4.0 International license.

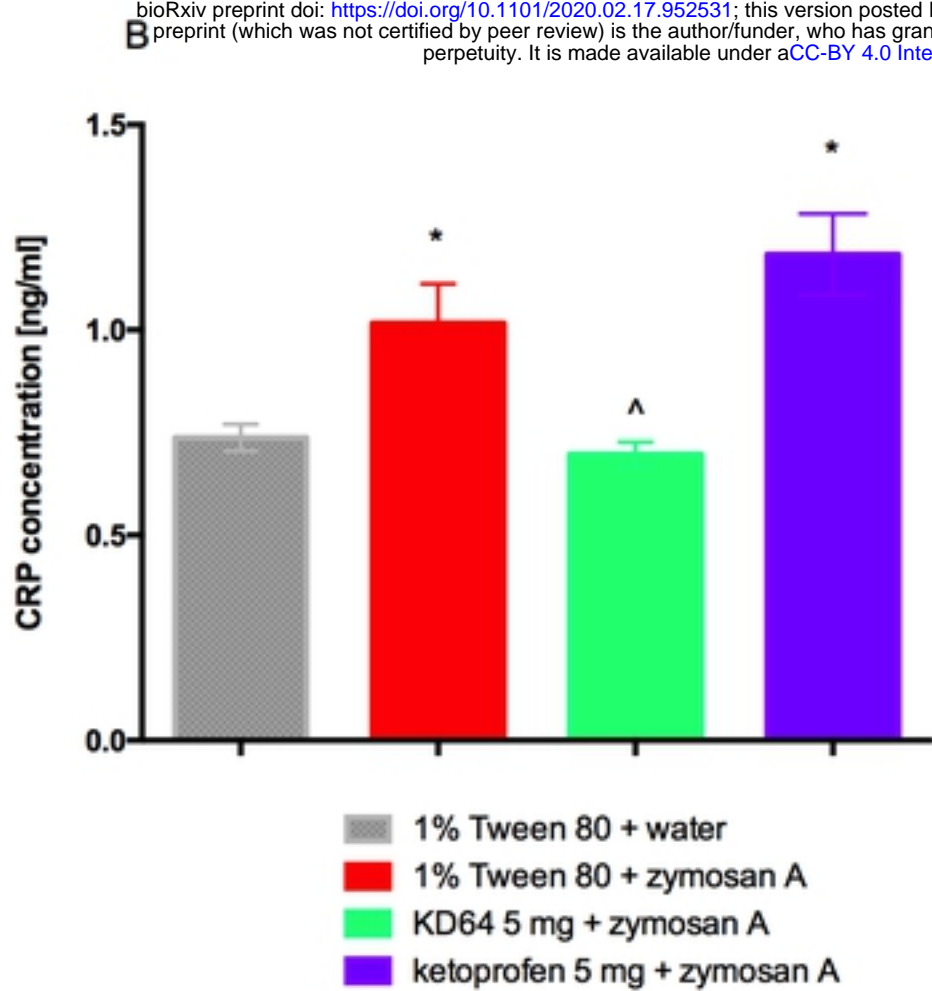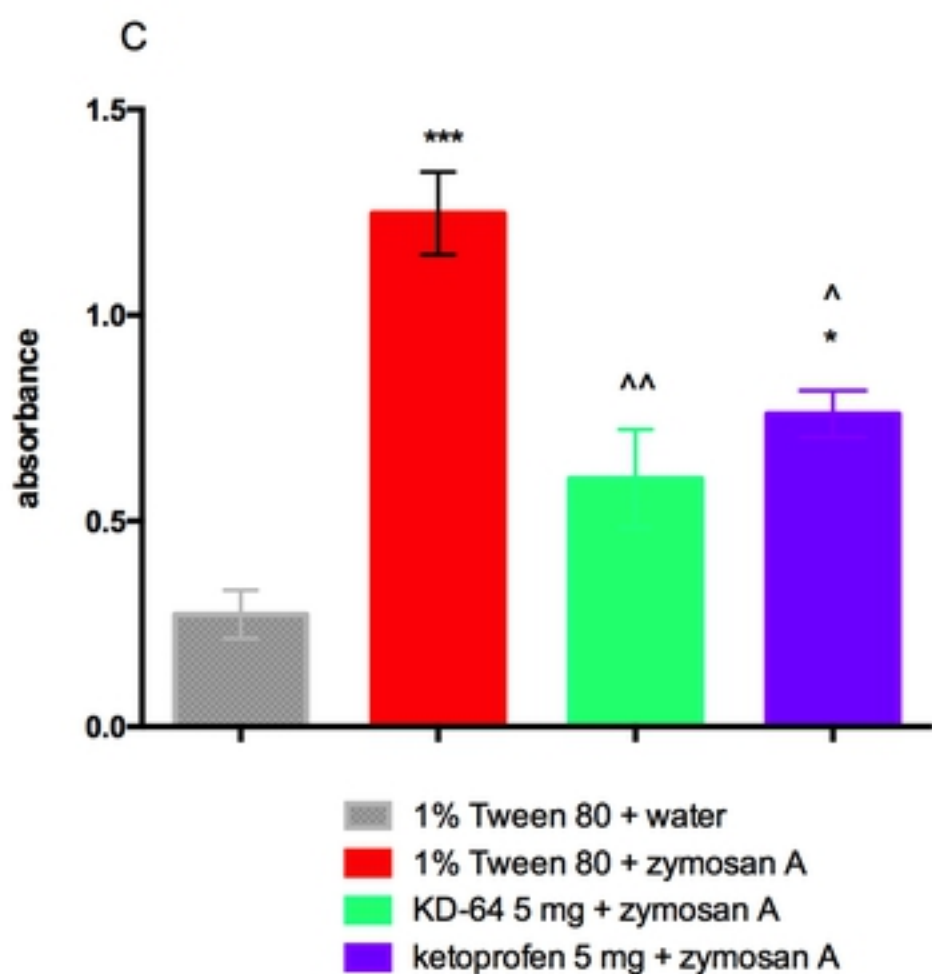

Figure 4

A

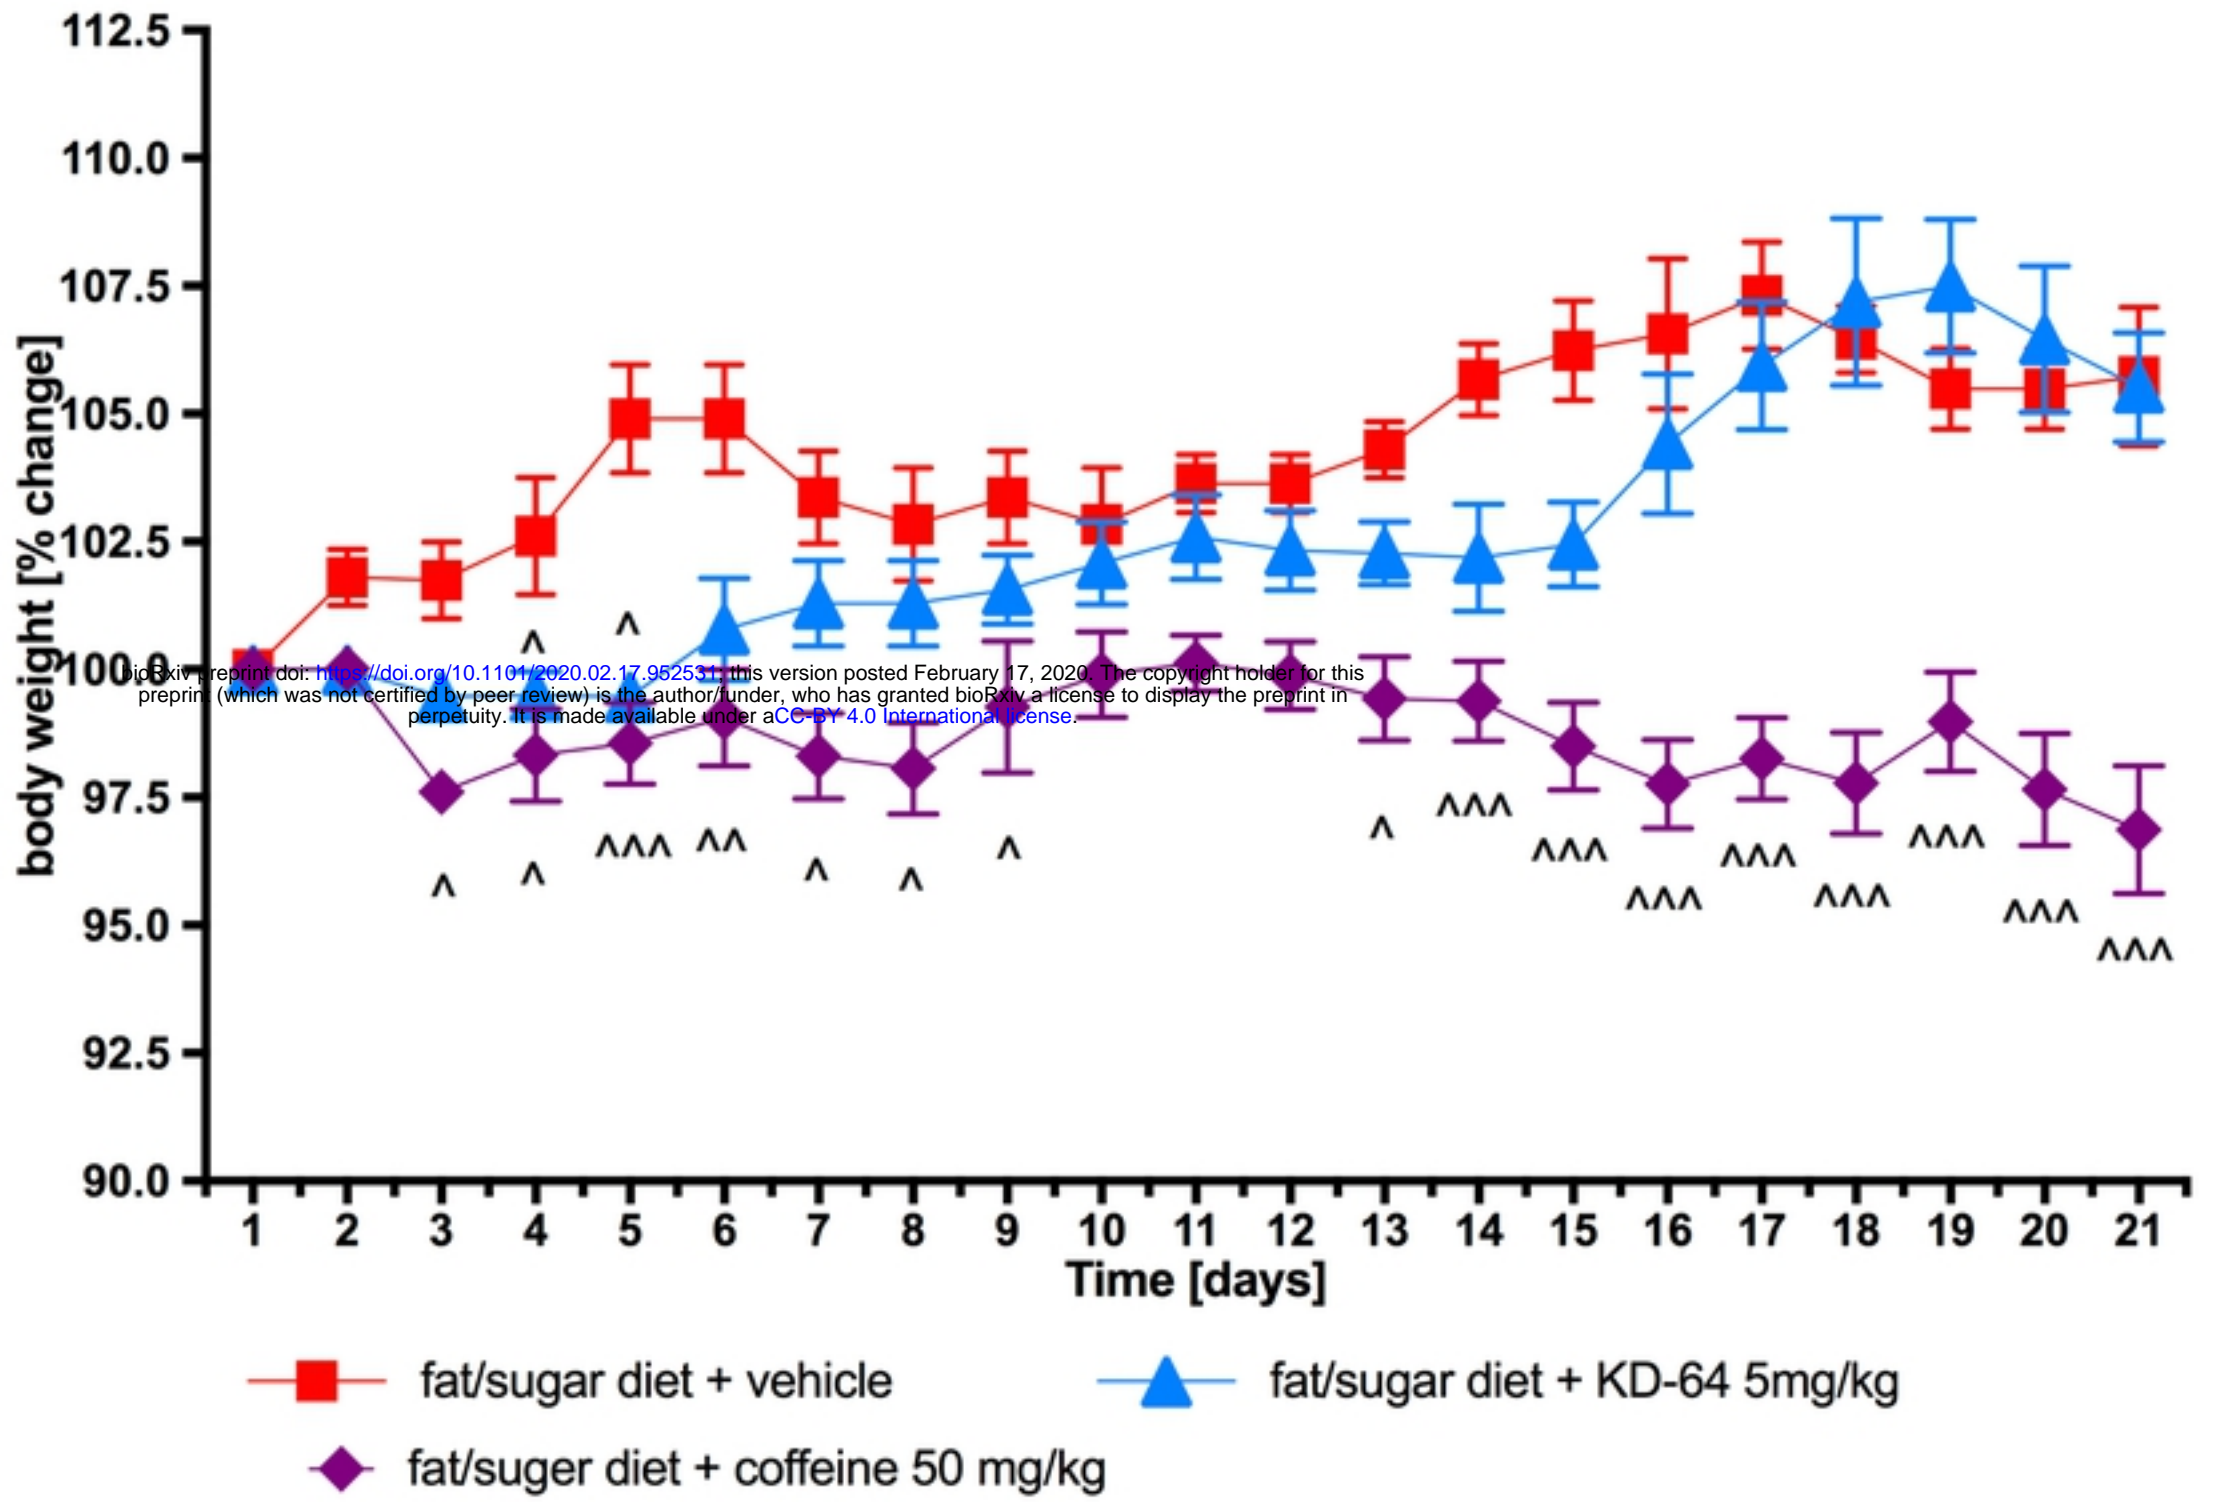

B

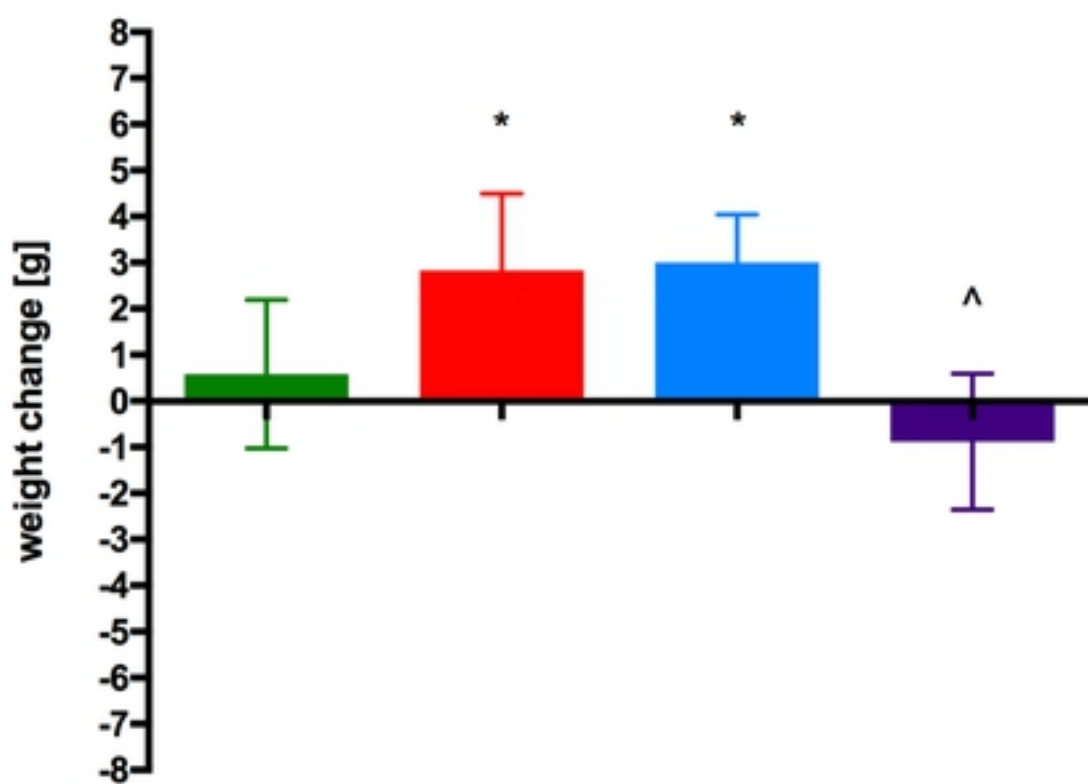

C

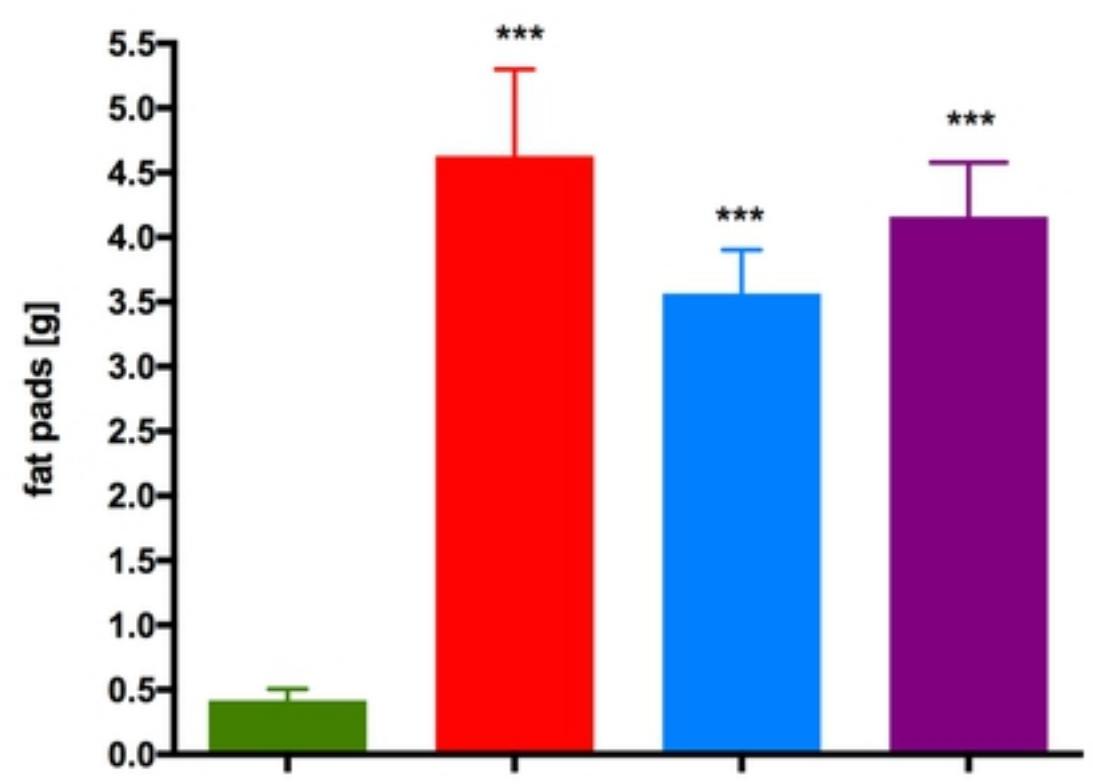

■ standard diet + vehicle      ■ fat/sugar diet + KD-64 5mg/kg  
■ fat/sugar diet + vehicle      ■ fat/sugar diet + caffeine 50 mg/kg

Figure 5

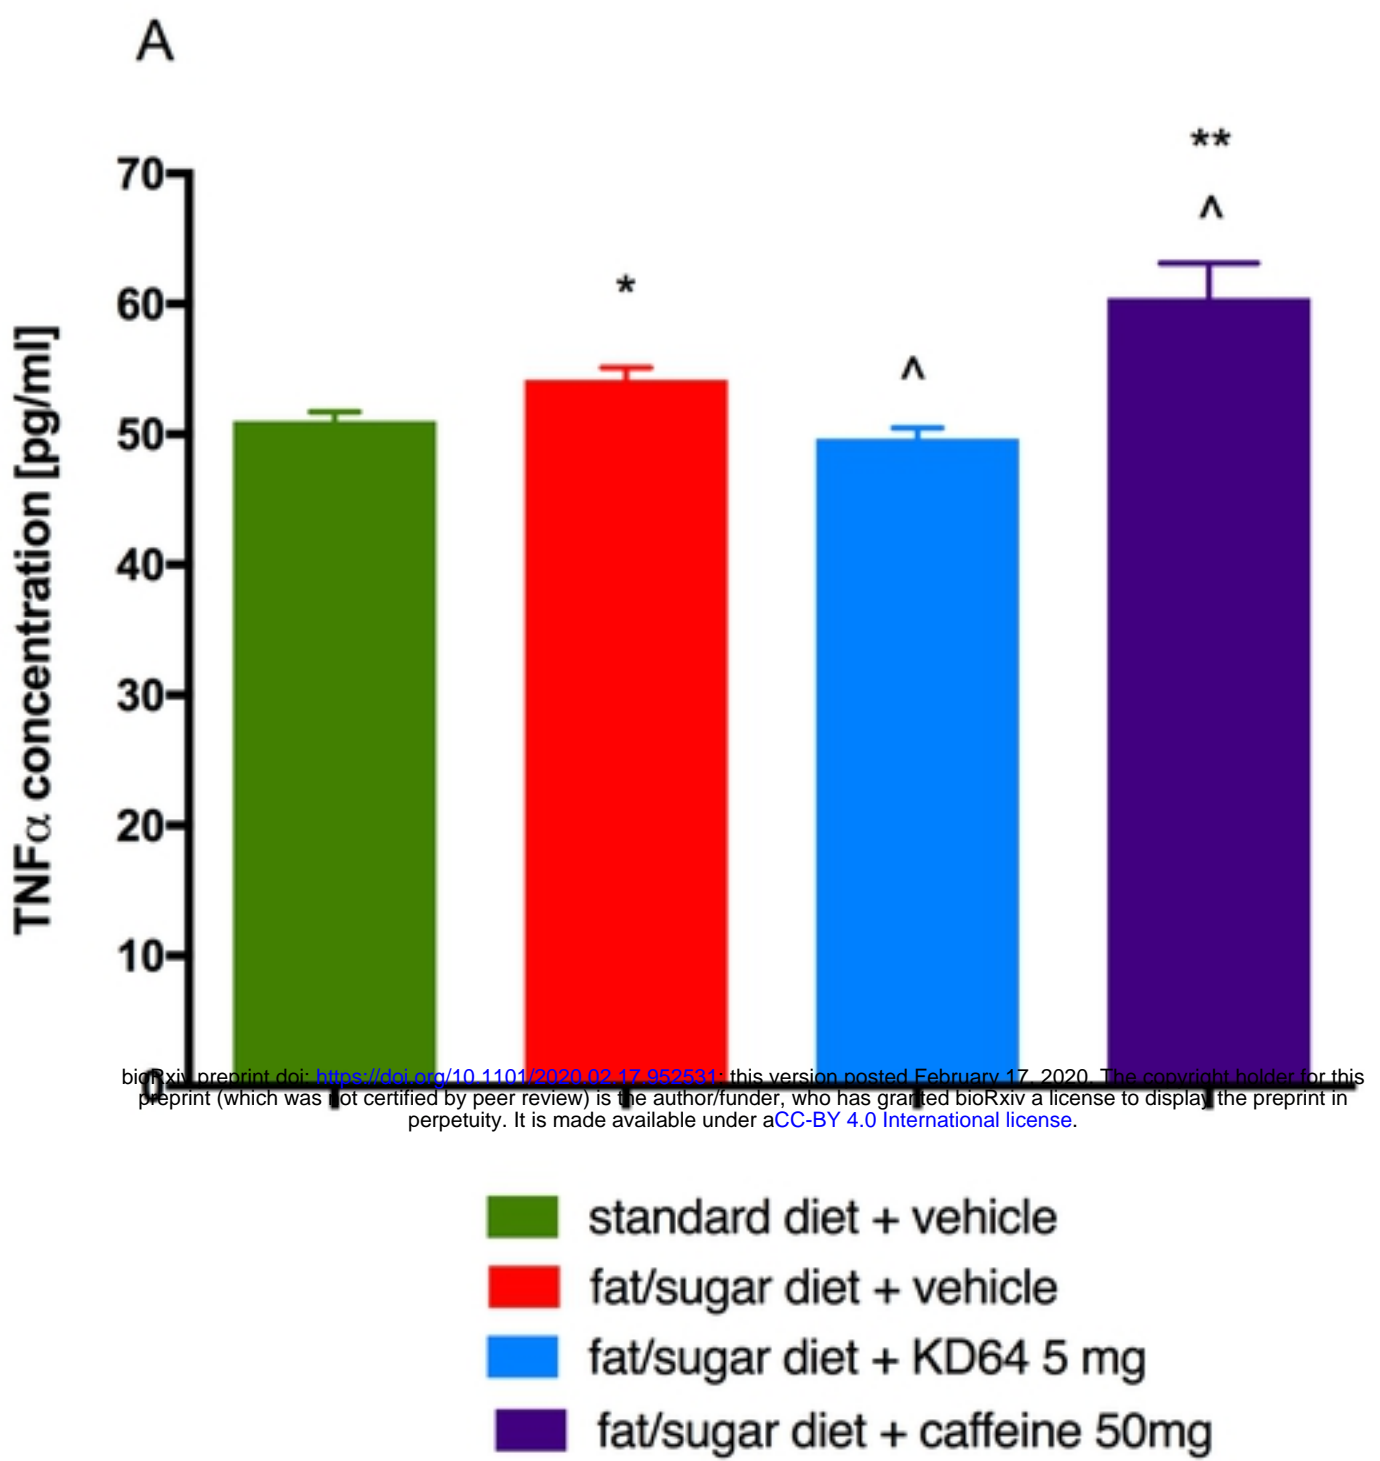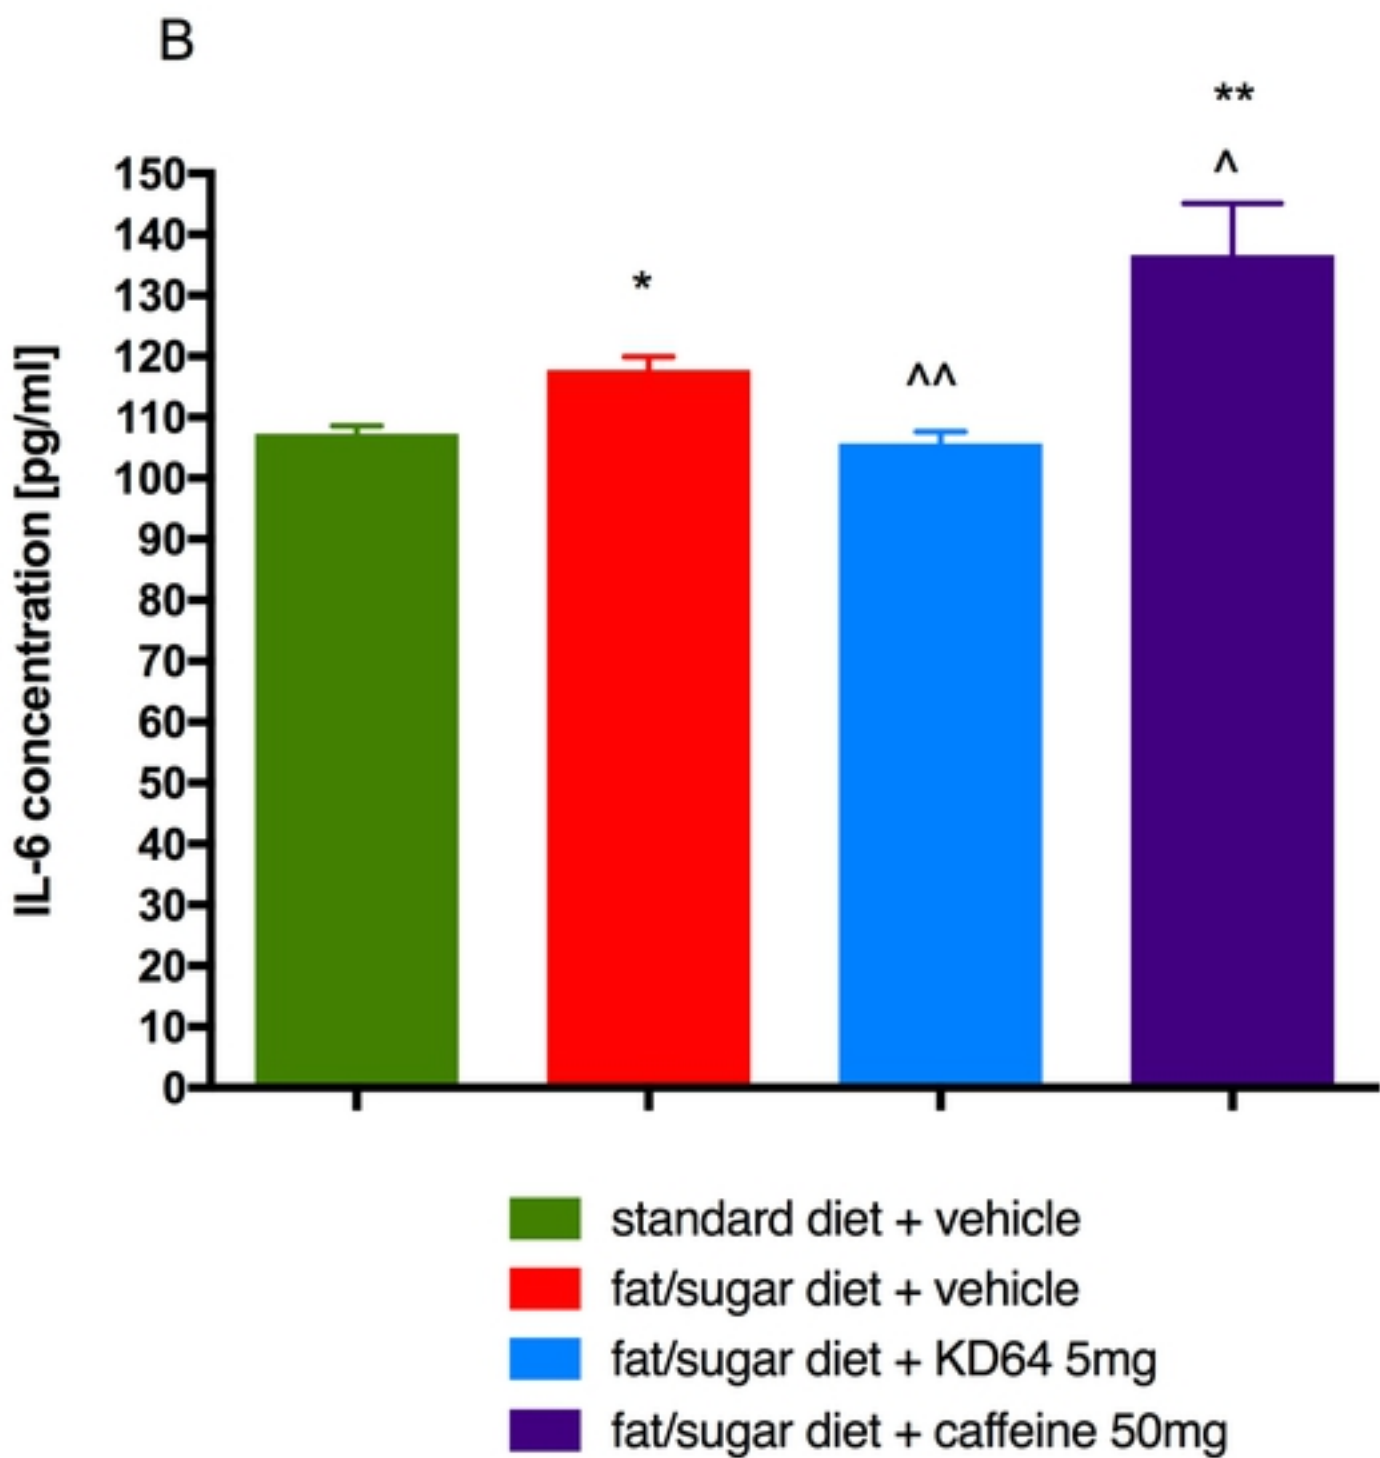

Figure 6

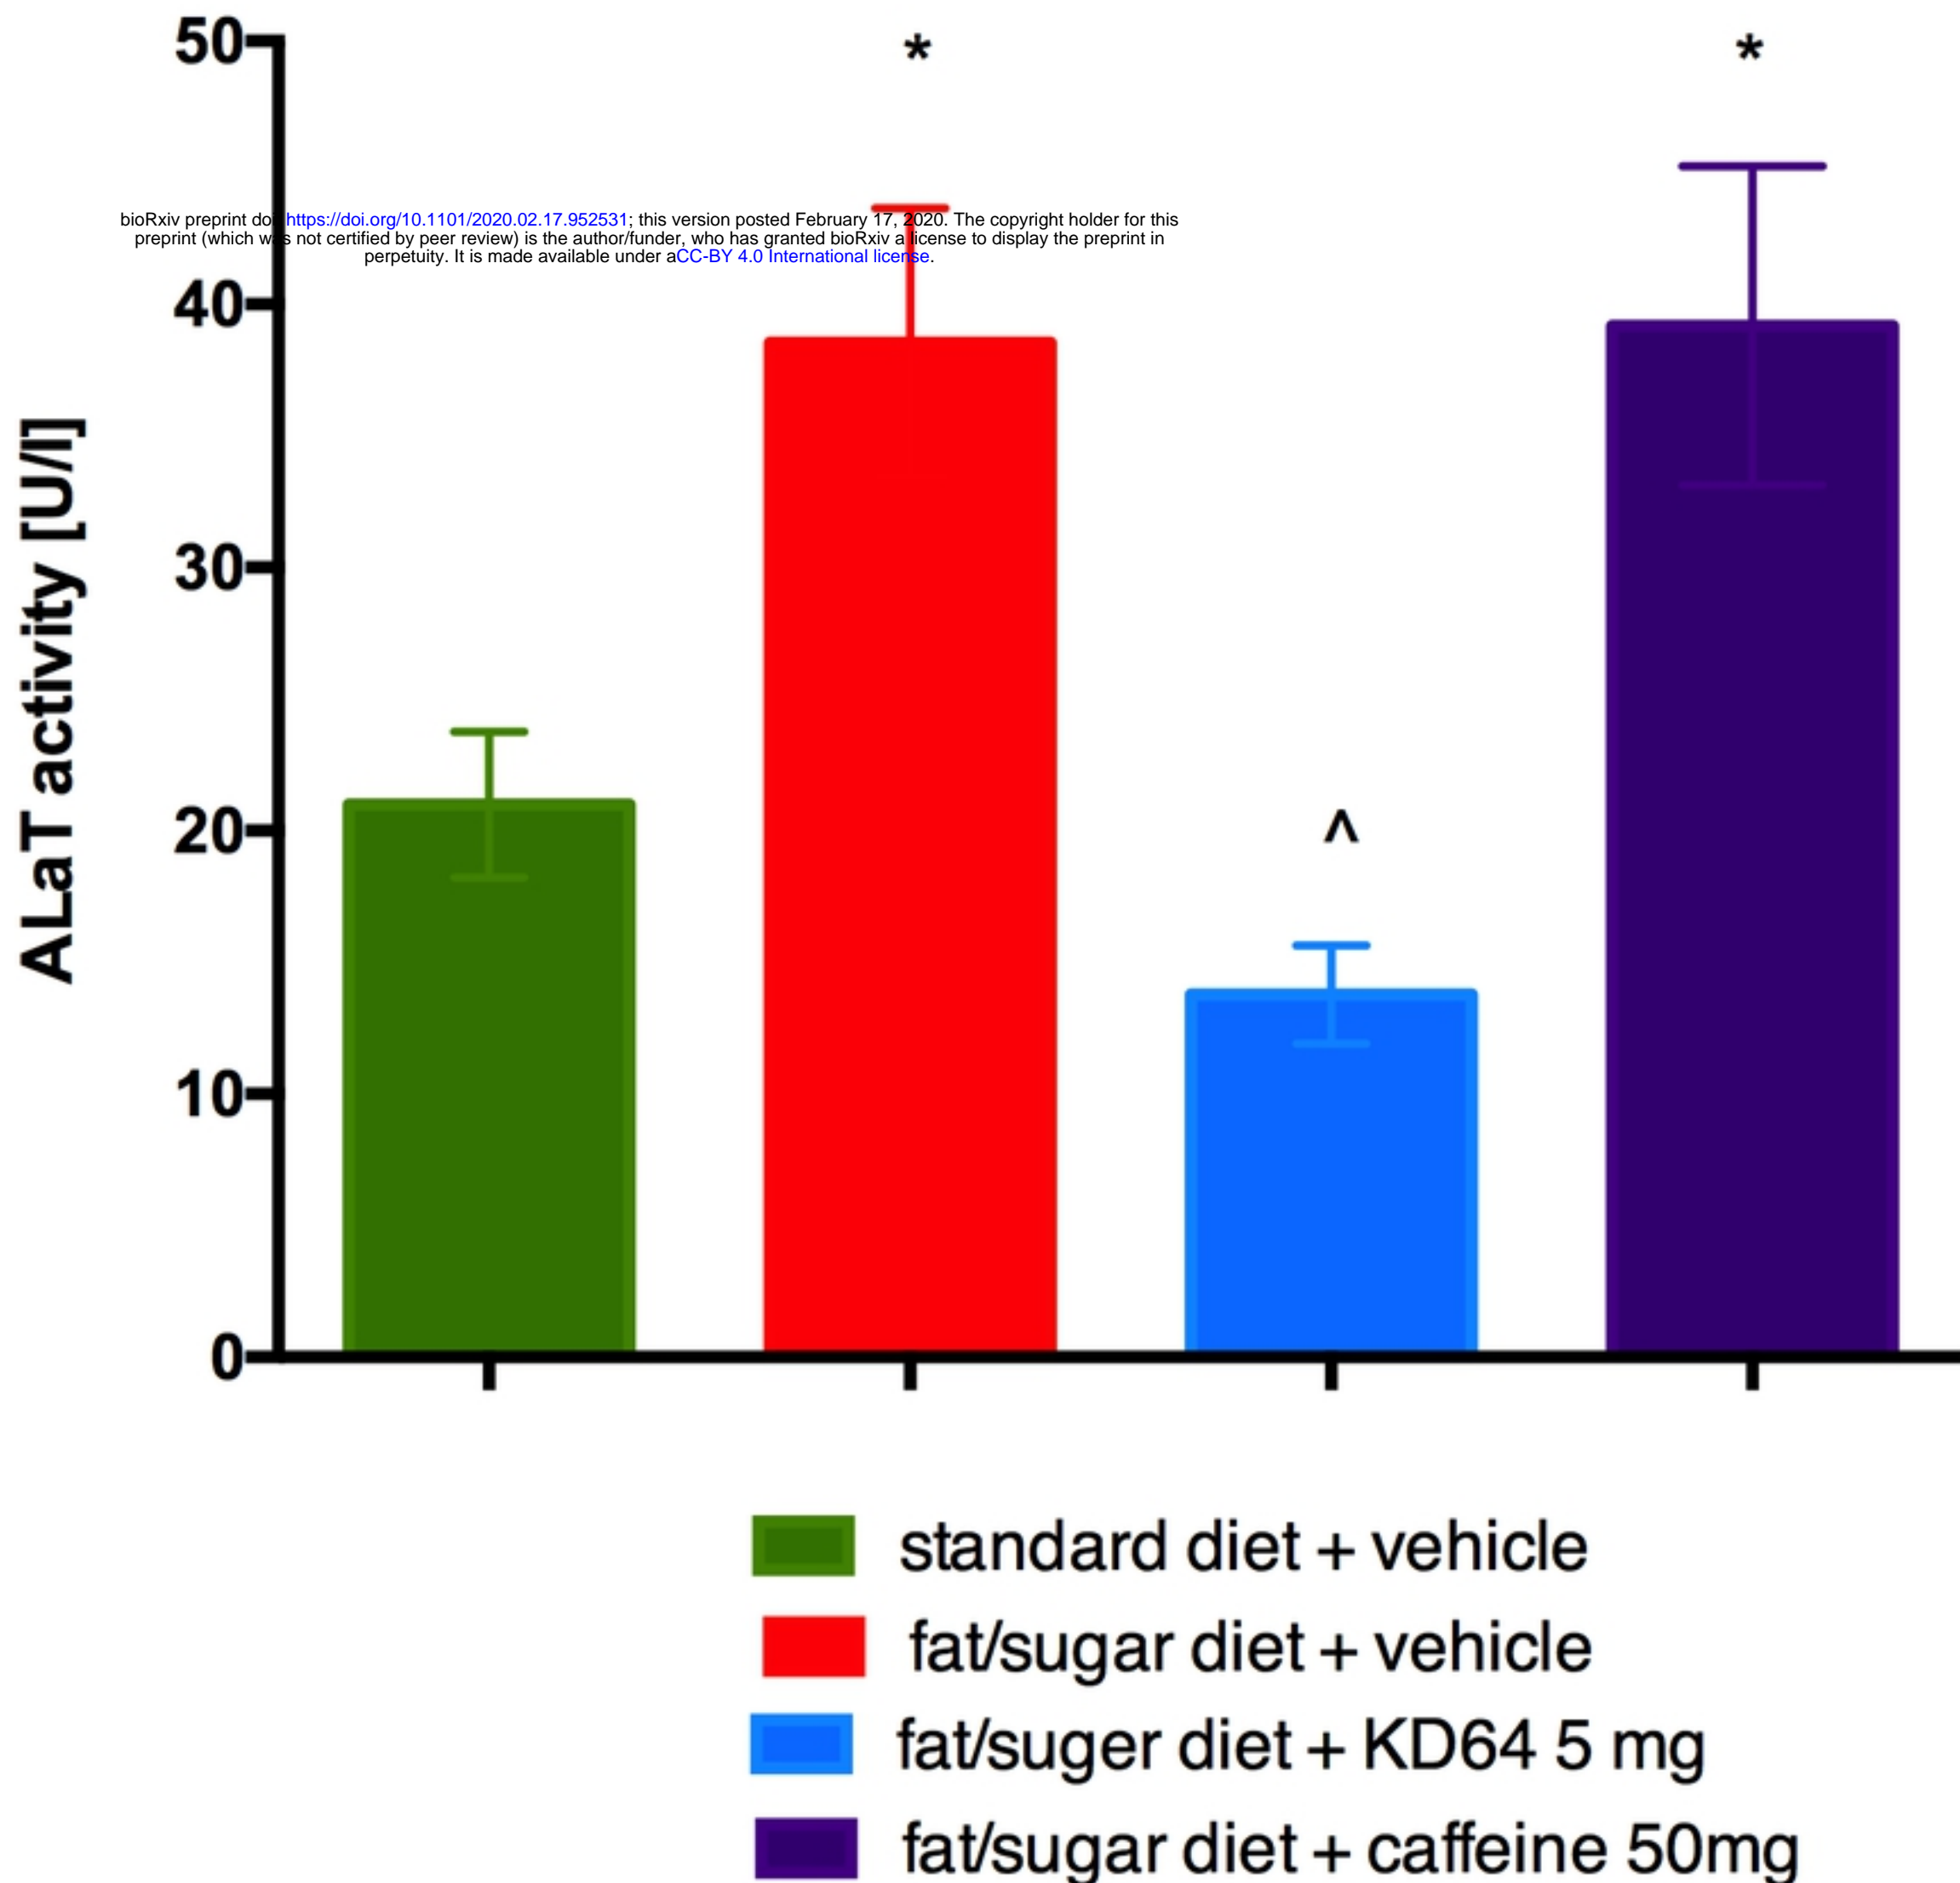

Figure 7

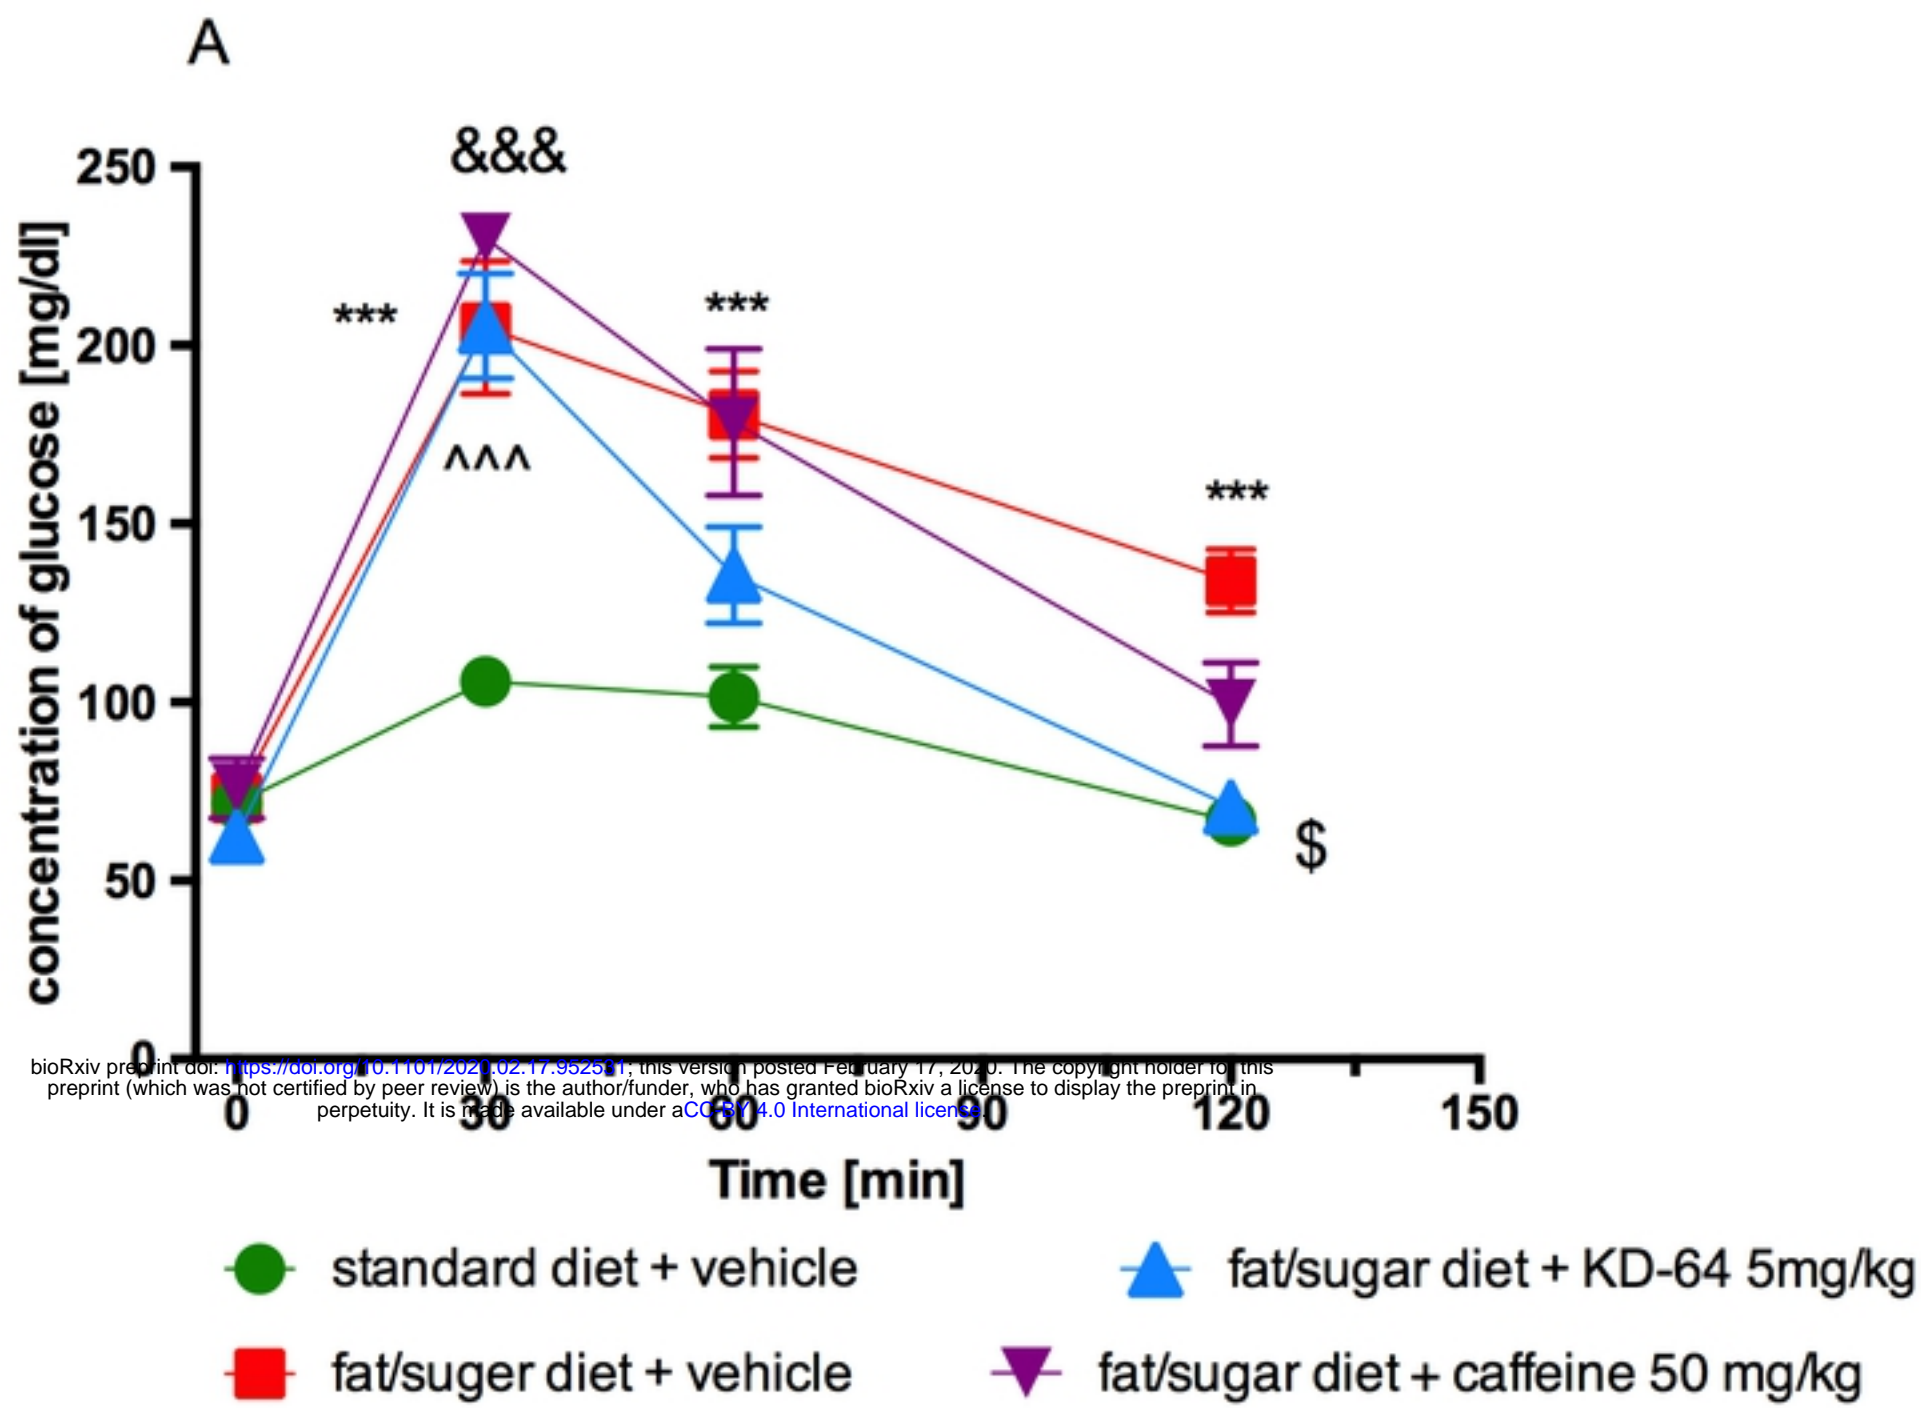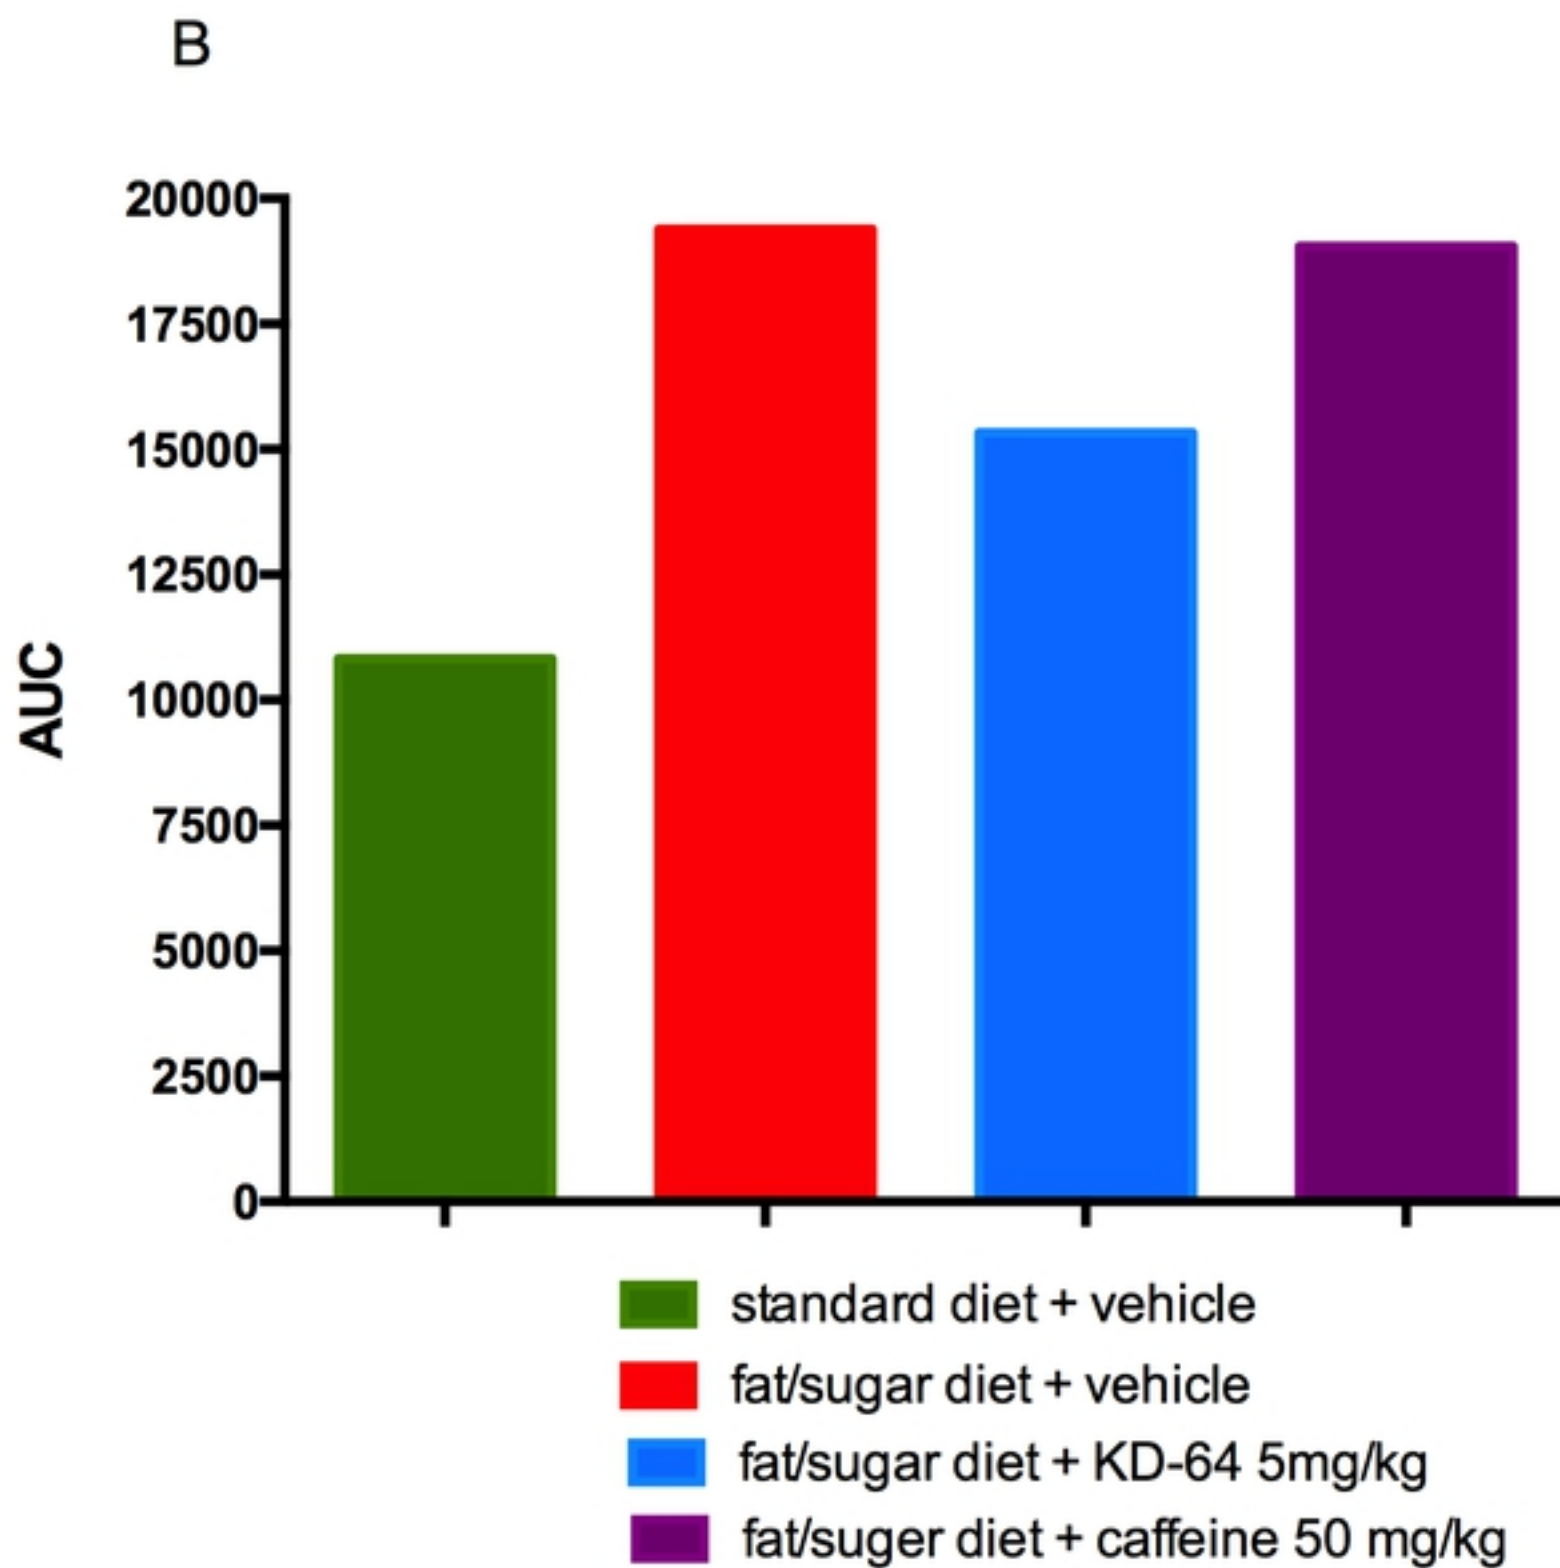

Figure 8

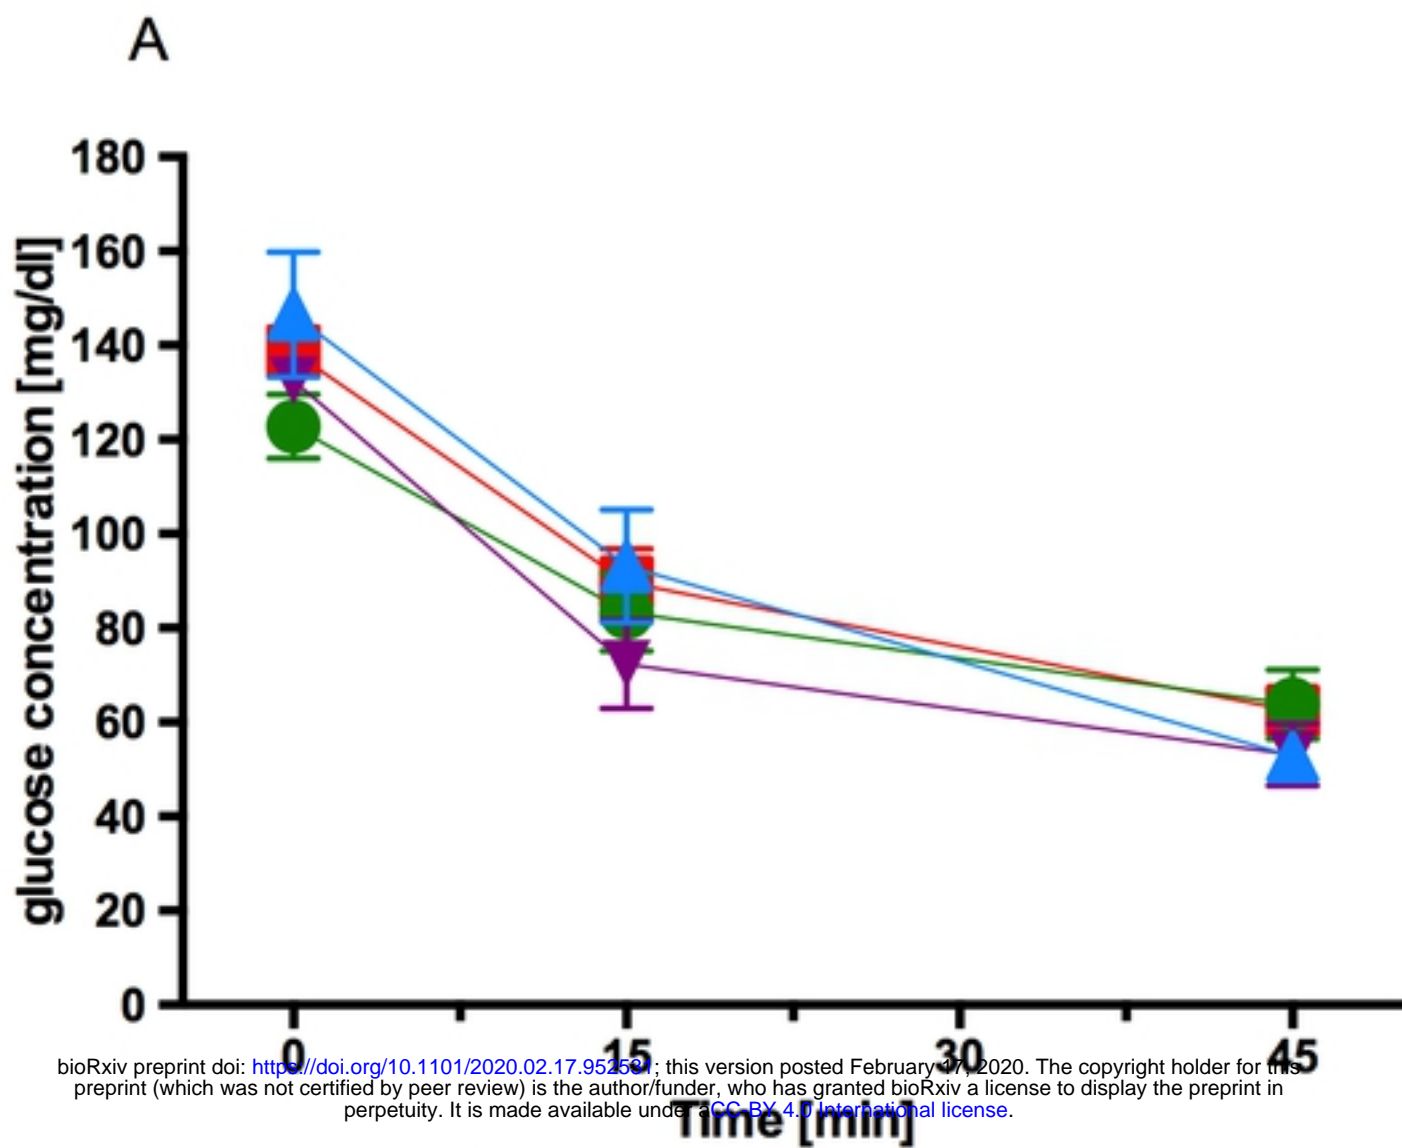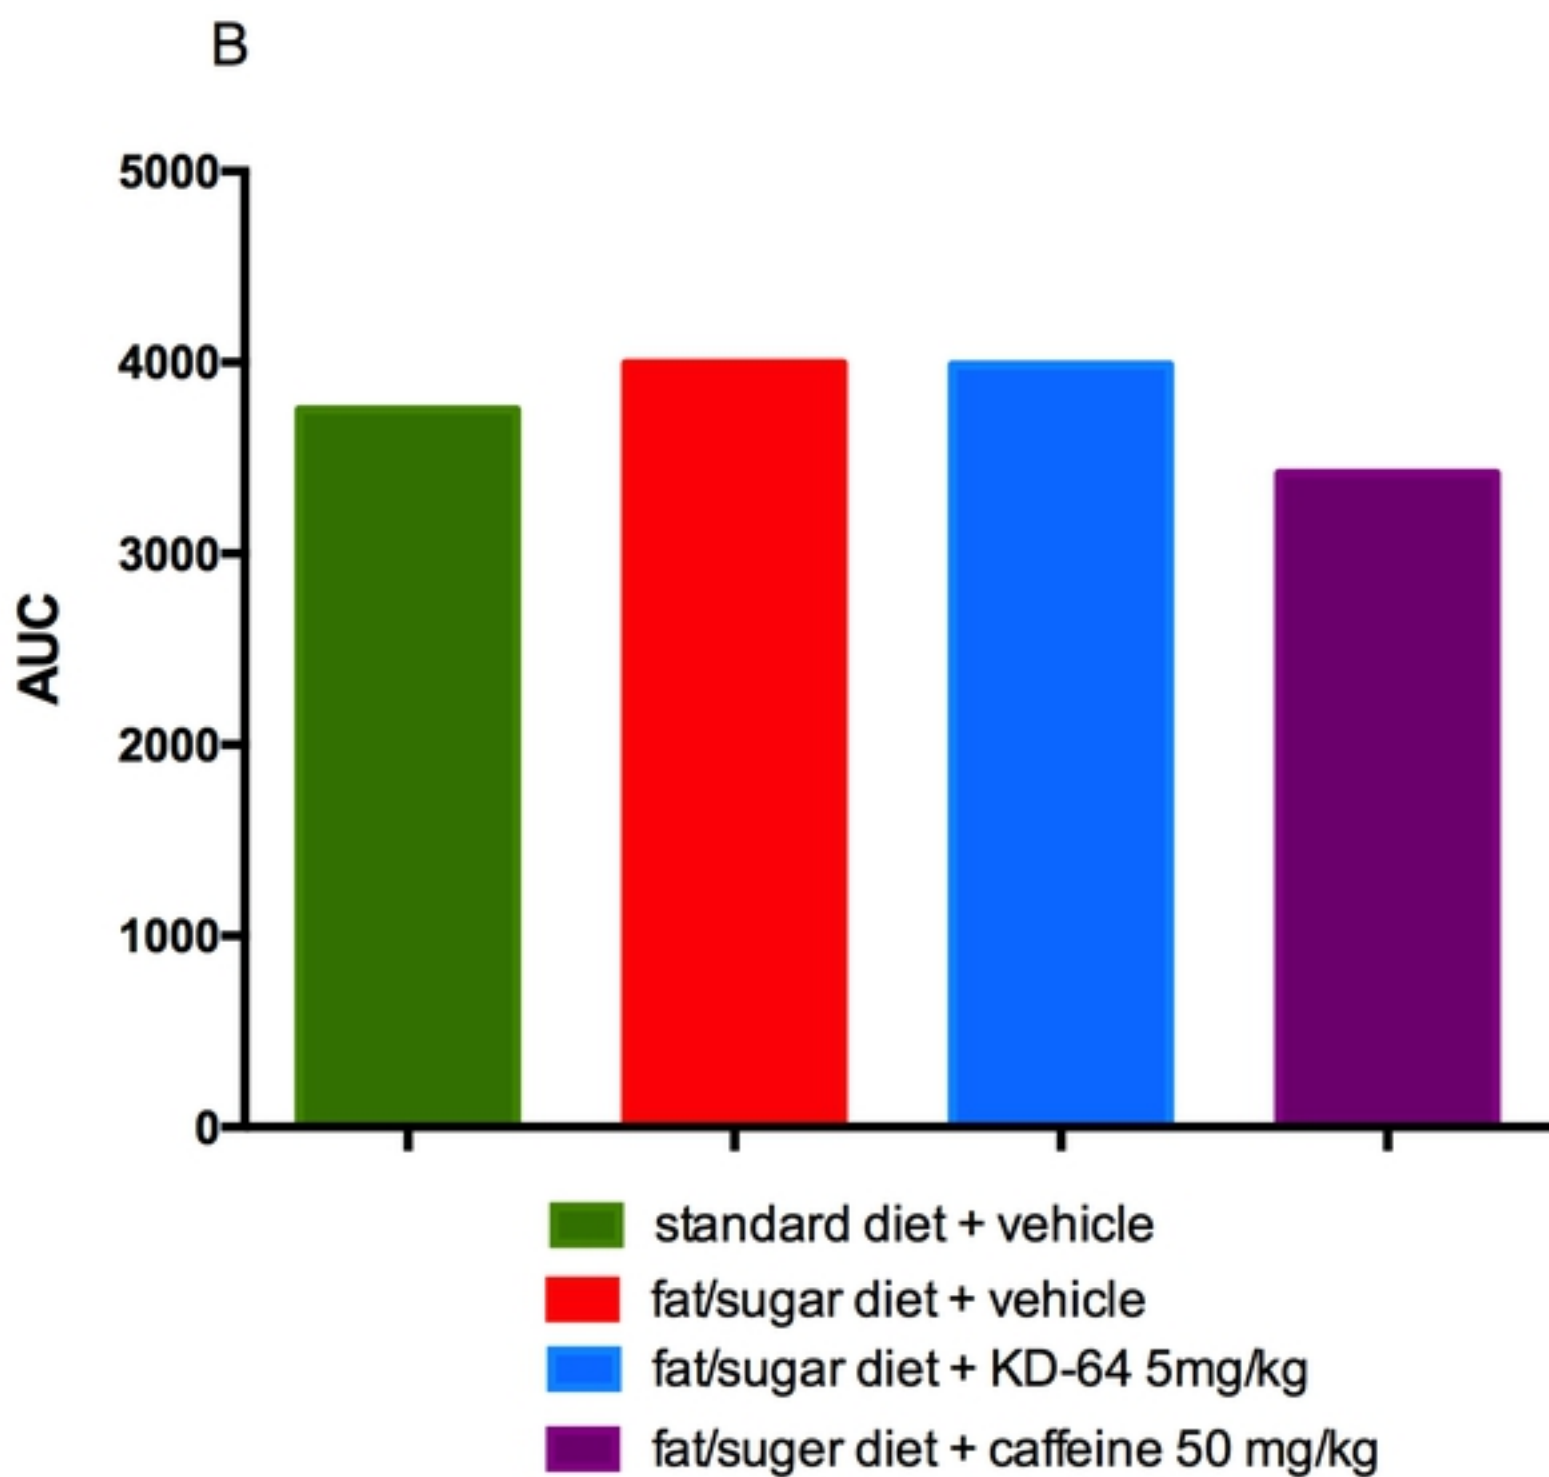

Figure 9



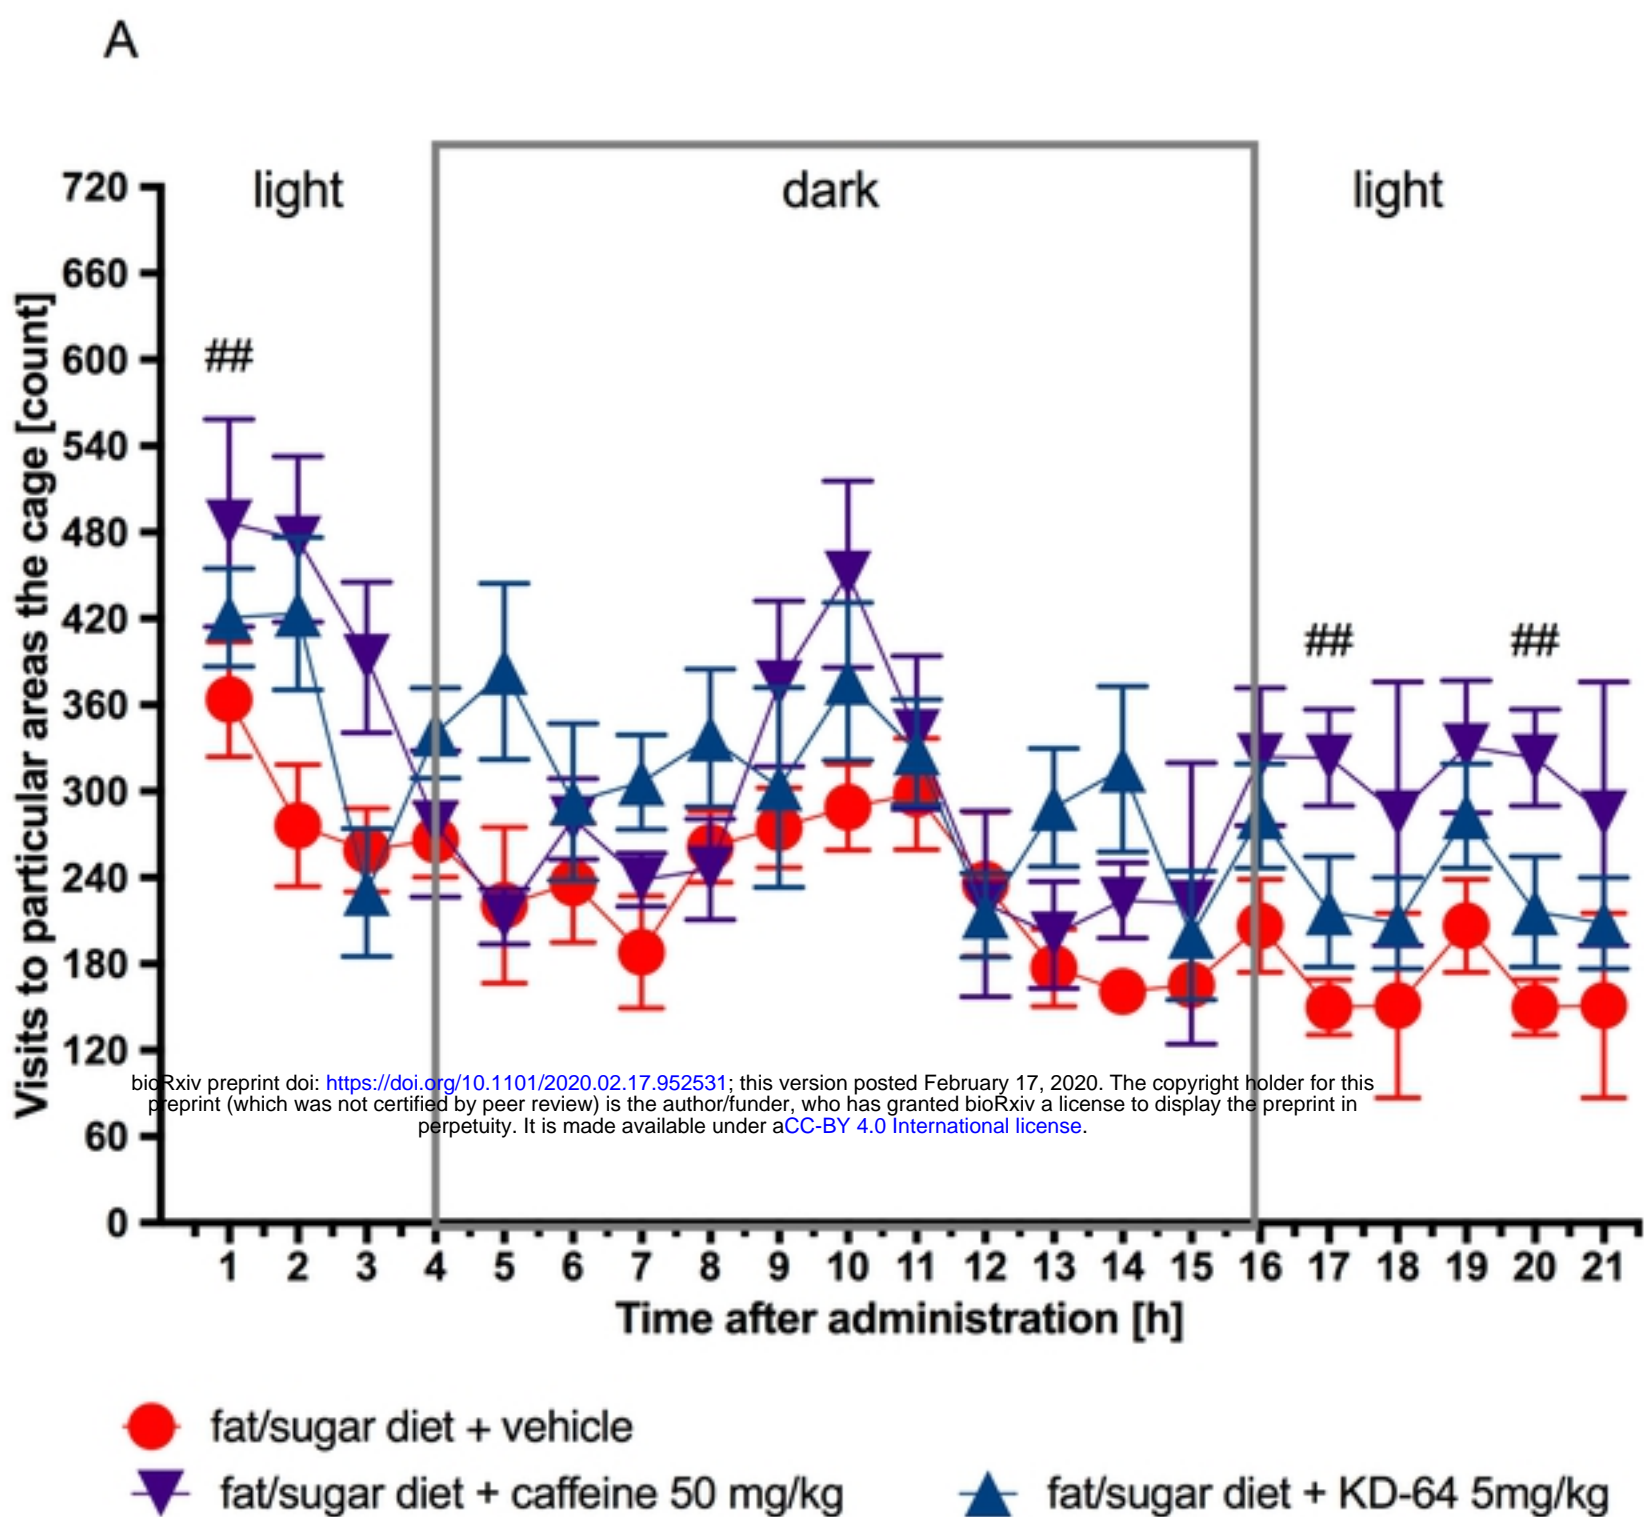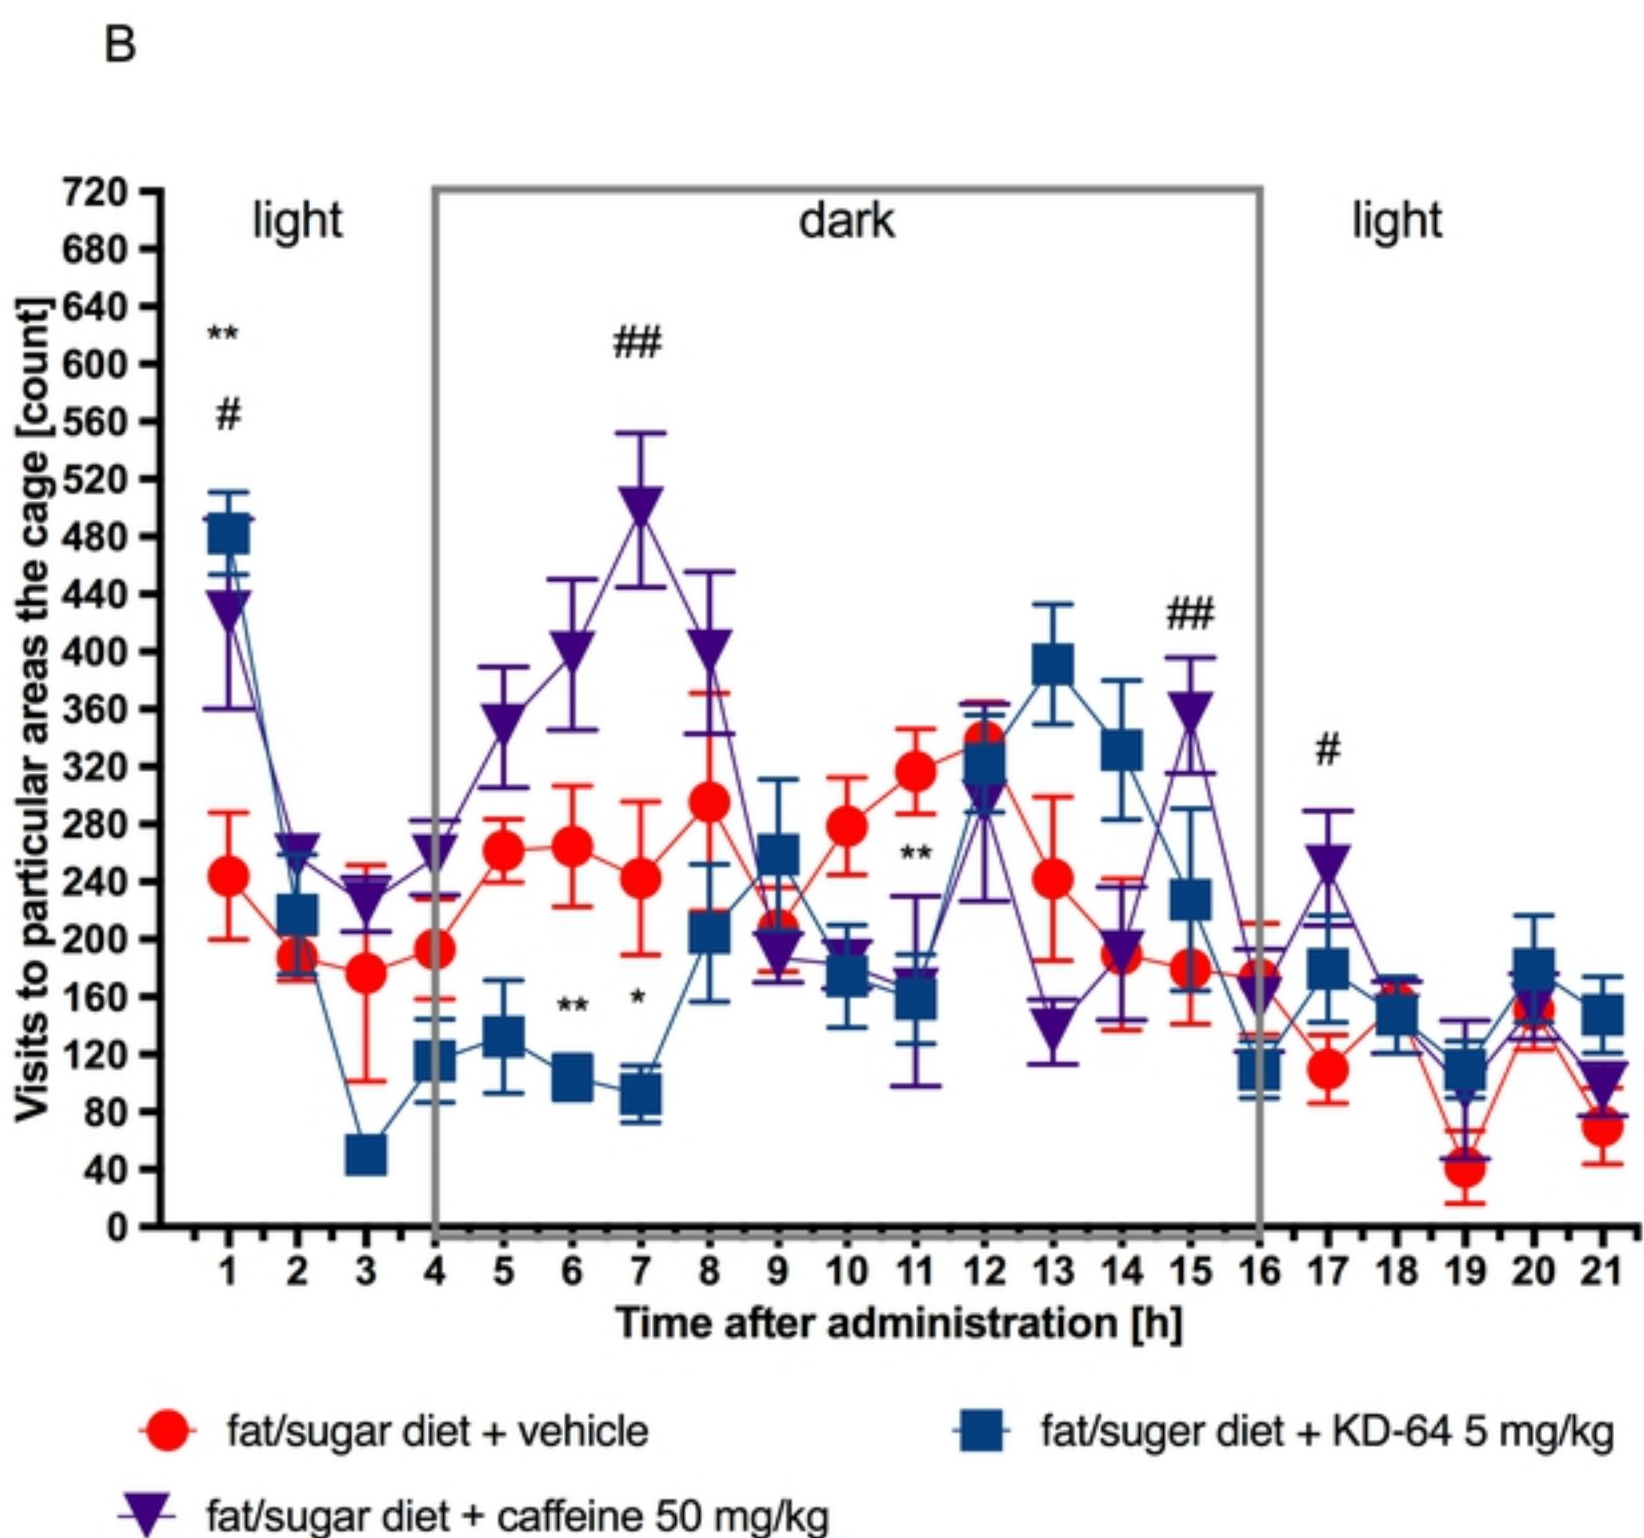

Figure 10
